1 Continental-scale hyperspectral tree species  
2 classification in the United States National  
3 Ecological Observatory Network

4

5 Sergio Marconi<sup>1</sup>, Ben. G. Weinstein<sup>1</sup>, Sheng Zou<sup>3</sup>, Stephanie A. Bohlman<sup>2</sup>, Alina Zare<sup>3</sup>, Aditya  
6 Singh<sup>4</sup>, Dylan Stewart<sup>3</sup>, Ira Harmon<sup>5</sup>, Ashley Steinkraus<sup>1</sup>, Ethan P. White<sup>1</sup>

7 <sup>1</sup>Department of Wildlife Ecology and Conservation, University of Florida, Gainesville, Florida,  
8 USA

9 <sup>2</sup>School of Forest, Fisheries and Geomatics Sciences, University of Florida, Gainesville, Florida,  
10 USA

11 <sup>3</sup>Department of Electrical and Computer Engineering, University of Florida, Gainesville, Florida,  
12 USA

13 <sup>4</sup>Department of Agricultural & Biological Engineering, University of Florida, Gainesville, FL, USA

14 <sup>5</sup>Department of Computer and Information Sciences and Engineering, University of Florida,  
15 Gainesville, FL, USA

16

17

## 18 Abstract

19

20 Advances in remote sensing imagery and machine learning applications unlock the potential for  
21 developing algorithms for species classification at the level of individual tree crowns at  
22 unprecedented scales. However, most approaches to date focus on site-specific applications  
23 and a small number of taxonomic groups. Little is known about how well these approaches  
24 generalize across broader geographic areas and ecosystems. Leveraging field surveys and  
25 hyperspectral remote sensing data from the National Ecological Observatory Network (NEON),  
26 we developed a continental-extent model for tree species classification that can be applied to  
27 the network, including a wide range of US terrestrial ecosystems. We compared the  
28 performance of a model trained with data from 27 NEON sites to models trained with data from  
29 each individual site, evaluating advantages and challenges posed by training species classifiers  
30 at the US scale. We evaluated the effect of geographic location, topography, and ecological  
31 conditions on the accuracy and precision of species predictions (72 out of 77 species).  
32 On average, the general model resulted in good overall classification accuracy (micro-F1 score),  
33 with better accuracy than site-specific classifiers (average individual tree level accuracy of 0.77  
34 for the general model and 0.70 for site-specific models). Aggregating species to the genus-level  
35 increased accuracy to 0.83. Regions with more species exhibited lower classification accuracy.  
36 Predicted species were more likely to be confused with congeneric and co-occurring species  
37 and confusion was highest for trees with structural damage and in complex closed-canopy  
38 forests. The model produced accurate estimates of uncertainty, correctly identifying trees where  
39 confusion was likely. Using only data from NEON, this single integrated classifier can make  
40 predictions for 20% of all tree species found in forest ecosystems across the entire US, which  
41 make up to roughly 90% of the upper canopy of the studied ecosystems. This suggests the

- 42 potential for integrating information from multiple datasets and locations to develop broad scale
- 43 general models for species classification from hyperspectral imaging.
- 44

## 45 1. Introduction

46 Forest ecosystems play a central role in essential services like providing wood and other  
47 forest products, carbon sequestration, and biodiversity conservation (Wiens, 2016; Pecl et al.,  
48 2017), but understanding patterns and processes driving forest properties and species  
49 distributions across scales can be challenging. A common strategy to monitor biodiversity and  
50 biomass of forests at national scales is to use field surveys of plots (USDA Forest Service,  
51 2001, Lawrence et al. 2010). Data collection within survey plots requires extensive effort,  
52 limiting even the most extensive national forest inventories to several thousand permanent plots  
53 sampled every few years (White et al., 2016), which can be too sparse for investigating the  
54 effects of management, soil properties, topography and local environmental conditions on large  
55 scale forest structure, distribution and diversity (Tomppo et al., 2008). Remote sensing can help  
56 bridge this gap between local and regional scales by providing individual tree level data at  
57 scales beyond what is feasible for traditional plot-level inventories (Anderson, 2018). Models  
58 linking remotely sensed imagery to field surveys can identify the location and species identity of  
59 individual trees (Henrys & Jarvis, 2019), alleviating the challenge of inferring local patterns from  
60 sparsely sampled data (Ayrey et al., 2019, Bastin et al., 2019, Kandare et al., 2017) for  
61 understanding tree species distributions and abundances.

62 Numerous approaches have been developed for pixel- or canopy-scale species-level  
63 classification using hyperspectral remote sensing based on exploiting spectral differences  
64 between tree species which are caused by differences in foliar properties and canopy structure  
65 (Shi et al., 2018, Mayra et al, 2021, Belgiu & Dragut, 2016, Ballanti et al., 2016, Ab Majid et al.,  
66 2016). Recent efforts in species classification use either deep learning methods (Nezami et al.,  
67 2020, Zhang et al., 2020, Martins et al., 2021) or ensemble of machine learning (Knauer et al.,  
68 2021, Grabska et al., 2020), showing promising improvements over more traditional approaches  
69 such as random forest, support vector machines or multi-layer perceptron classifiers. In general,

70 most approaches are conducted with datasets covering small site- and/or ecosystem-specific  
71 extents (Fassnacht et al., 2016) rarely focus on classification of individual trees (but see urban  
72 tree mapping e.g. Martins et al., 2021), and often focus only on less than 10 species  
73 (Michałowska et al. 2021). For example, because of limitations related to coarse pixel size,  
74 many studies using satellite data either predict the dominant species within plot-sized pixels  
75 (Grabska et al., 2020, Wang et al., 2022) or classify the relative distribution of broad vegetation  
76 types within pixels (Bogan et al., 2019). These approaches are valuable for addressing  
77 processes for which information about dominant species in the community or ecosystem type is  
78 needed (e.g. monitoring forest aboveground biomass, Laurin et al. 2020), but are currently  
79 limited in their ability to provide precise taxonomic information at the individual level. Precise  
80 fine-grained species information is important for assessing forest biodiversity, tree-level growth  
81 and species interactions (Anderson, 2018). Other recent works have leveraged high resolution  
82 airborne missions to generate tree surveys covering hundreds of km<sup>2</sup> and encompassing  
83 multiple management regimes and forest types (Modzelewska et al., 2020, Modzelewska et al.,  
84 2021). Yet these works target single biomes, and so even though they provide valuable surveys  
85 for key species across different stand ages, communities structures and topographic positions,  
86 their use is still limited to individual biomes and relatively small regions.

87         Developing remote sensing models specifically for individual regions, sites and/or  
88 ecosystems, as is typically done with remote sensing from airplanes and UAVs, limits the use  
89 of the models beyond the region and training data, making it difficult to: 1) conduct research at  
90 regional to continental scales due to the lack of general models that can be applied across  
91 ecosystems; 2) identify rare or uncommon species due to limited data for training models, which  
92 often results in studies focusing on a limited subset of common species; and 3) accurately apply  
93 the model beyond the region or conditions of the associated field data. Furthermore, training  
94 data from single site studies often lack the full range of variation in spectral characteristics that

95 can occur for each species due to intraspecific variation. Developing generalizable species  
96 classification models based on data across different forest types and large spatial extents  
97 unlocks the potential for overcoming these limitations and increases the utility of remote sensing  
98 for building reliable broad scale tree species surveys.

99         Developing individual tree level species classification models that span geographic  
100 areas, forest types and species pools poses a novel set of challenges. First, it requires building  
101 a library of co-registered field and remote sensing data that includes data from multiple sites  
102 and ecoregions for training and testing algorithms. Second, increasing the geographic extent of  
103 species classification risks confusing species that have similar spectral properties but do not  
104 overlap in their geographic distributions. Third, combining data from multiple sites may introduce  
105 variation in spectral reflectance due to differences in phenology (which affect leaf greenness)  
106 and environmentally driven intraspecific variation, which affect leaf biochemistry, crown shape  
107 and leaf biophysical traits (Sims & Gamon, 2002). Finally, aggregating remote sensing data  
108 from multiple flights, sensors, and sites may increase variation in spectral signatures due to  
109 complex sources of spatial and temporal variation that are linked, but not limited to, acquisition  
110 dates, solar angles, ecosystem types and variation in sensor calibrations (Pax-Lenney et al.,  
111 2001). Therefore, while there are many potential benefits to models for species classification  
112 across large spatial extents, it is unclear how they will perform compared to local models  
113 developed for specific ecosystems.

114         Here, we leverage newly available data from the National Ecological Observatory  
115 Network (NEON) to develop a continental level model for tree species classification that can be  
116 applied to the entire network and compare its performance to the traditional approach of building  
117 individual models for each site. We used NEON remote sensing and field data on individual  
118 trees at 27 terrestrial sites from Puerto Rico to Alaska, covering a wide range of ecoregions and  
119 biomes across the United States (US). Several studies have developed species classification

120 models for NEON data, but all these studies focused on individual NEON sites (Scholl et al.,  
121 2020, Fricker et al., 2019, Marrs & Ni-Meister, 2019, Marconi et al., 2020), or 2-3 sites in the  
122 same region (Graves et al. 2021). We build on these single site models to develop a general  
123 model that can be applied across the entire NEON network by connecting field-identified tree  
124 stems to hyperspectral images. We used an ensemble of species classification models to allow  
125 for leveraging the strengths of different machine learning classifiers and provide effective ways  
126 to estimate the uncertainty of predictions (Engler et al., 2013, Saini & Ghosh, 2017, Sagi &  
127 Rokach, 2018). Using this model, we (1) assess whether a general model approach improves  
128 performance compared to separate models for each site, (2) determine the importance of  
129 reflectance, geography, environmental and ecological conditions on the accuracy and precision  
130 of species predictions; (3) evaluate the uncertainty in predictions; and (4) discuss the potential  
131 for this general model to be used for ecological applications.

## 132 **2. Methods**

### 133 **2.1. Field Data**

134 Vegetation structure field data ([https://data.neonscience.org/data-](https://data.neonscience.org/data-products/DP1.10098.001)  
135 [products/DP1.10098.001](https://data.neonscience.org/data-products/DP1.10098.001)) were collected by the NEON terrestrial observatory system (TOS)  
136 between 2015 and 2019 (Table S.1). This dataset, sampled from 400 m<sup>2</sup> plots distributed across  
137 the landscape of each NEON site, includes information about individual trees' geolocation and  
138 properties such as species identity, health status, canopy position, crown diameter, and tree  
139 height. Vegetation structure plot locations are located randomly across the sites stratified by  
140 vegetation type within each site with the aim of capturing landscape level biological and  
141 structural diversity at each site. Each subplot (200m<sup>2</sup> in size) is assigned to an ecosystem type  
142 extracted from the National Land Cover Dataset. For this study we used data from 27 of the 41

143 NEON sites with partial to complete forest cover, encompassing 17 out of 18 ecoclimatic  
144 domains in the US (Figure S.1). We used a total of 1701 subplots from 714 plots. Data from the  
145 other NEON sites could not be used because either field data about tree stem positions was  
146 missing or the remote sensing imagery contained gaps in the hyperspectral or lacked  
147 information about the sensor angle at the time of data collection. We only included individual  
148 stem data that met the following criteria: (a) the stem had a species label assigned to it, (b) it  
149 was marked as “alive” and “tree” in the NEON field inventory, and (c) it belonged to a species  
150 with more than 5 entries for the entire cross-site dataset. We also did not use stems designated  
151 in the NEON vegetation structure data as fully shaded, shrubs or sapling, as these stems are  
152 most likely not visible in the remote sensing imagery and would therefore be erroneously paired  
153 with pixels belonging to species from neighboring overstory crowns. The final dataset used for  
154 species classification consisted of 5697 individual trees of 77 species.

## 155 2.2. Remote sensing data

156 For this study we used the hyperspectral L3 data from the NEON Airborne Observatory  
157 Platform (NEON, 2021). These data are provided in 1 km<sup>2</sup> tiles with 426 channels recording  
158 reflectance in 5 nm bands from 350 to 2450 nm. Reflectance data was atmospherically  
159 corrected using the ATCOR-4 approach (Krause et al., 2011). Pixel size is 1 m<sup>2</sup>. We applied  
160 bidirectional reflectance distribution function (BRDF) correction, topographic correction,  
161 and L2 normalization to reduce the effect of peripheral light and non-Lambertian scattering with  
162 the goal of minimizing variation in reflectance ascribable to flight path and airplane position  
163 (Marconi et al., 2020). For all tiles (n = 4500), we used the same general parameterization to  
164 define the BRDF kernel. We also dropped bands in the water absorption regions of the spectra  
165 (1340 – 1430 nm and 1800 - 1955 nm) as well as the spectrometer’s peripheral bands to reduce  
166 the effects of noise and artifacts. Thus, the hyperspectral data were reduced to a total of 347



167 channels. In the tree species classification models, we included terrain elevation (1 m<sup>2</sup> spatial  
168 resolution) along with the hyperspectral data because of elevation's potential information in  
169 discriminating species within landscapes (Strahler et al., 1978, Scholl et al., 2020). Elevation  
170 data were derived from a LiDAR sensor mounted along with the hyperspectral sensor on the  
171 aircraft, which was converted into a 1 m spatial resolution raster and appended to the  
172 hyperspectral data as an additional band.

173 We assigned each individual tree from the filtered field dataset to a square clip of 16  
174 pixels (4 m crown diameter), centered around the stem's GPS coordinates. This threshold was  
175 selected because it is smaller than more than 95% of individual tree crowns diameter measured  
176 from the NEON vegetation structure dataset. We adopted this strategy to reduce the number of  
177 mislabeled pixels at the edges of the crown that belong to neighboring trees, especially in dense  
178 closed canopies. To remove shaded and non-vegetation pixels from these clips, we removed all  
179 pixels with NDVI < 0.5 and low reflectance in the NIR (reflectance at 825nm < 0.2). Since stem  
180 positions often do not match precisely with the center of the tree crown in the canopy, pixels will  
181 sometimes be assigned to the wrong label. To reduce this, we filtered out pixels that were much  
182 shorter than the maximum height of the crown. These pixels are less likely to belong to the  
183 sunlit portion of the target crown or may even measure the reflectance from neighboring shorter  
184 tree crowns, or the understory within a gap in the target crown. We filtered out pixels that were  
185 ≥5 m below the top height of the tree as determined by the maximum height of the tree from the  
186 LiDAR data in the 16-pixel clip. Finally, we removed stems with field GPS locations that fell  
187 within 3 meters of one another where the stems belonged to different taxa to decrease the  
188 chance of confusing closely neighboring, and potentially intermixed, tree crowns of different  
189 species. After all these steps, the final, filtered dataset used ~50,000 out of 200,000 initial pixels  
190 and 6449 out of ~21,000 crowns in the original vegetation structure dataset.

191           Due to the large number of correlated bands in hyperspectral data, it is necessary to  
192 reduce the number of features used in classifiers and limit the potential for overfitting (Li et al.,  
193 2011). Although PCA is the most common approach to achieve dimensionality reduction, it  
194 comes with a number of limitations that could be problematic when aggregating information from  
195 different image collections, since it is sensitive to outliers, assumes linear relationship across  
196 features, and it is prone to discarding low rank components that may have high discriminative  
197 information (Prasad & Bruce, 2008). An alternative solution to reduce these issues is to use  
198 untransformed hyperspectral reflectance and group highly correlated bands based on their  
199 distribution in the form of probability densities (Delicado, 2011). This is possible using a  
200 hierarchical dimensionality reduction, consisting of clustering bands with similar standardized  
201 distributions according to Kullback-Leibler divergence (KLD) (Zare et al., 2019). The advantage  
202 of this approach is that it allows for reducing the number of features used while using  
203 untransformed spectral information, thus identifying redundant bands, highlighting highly  
204 correlated regions of the spectra (Yang et al., 2014), and allowing for a direct identification of  
205 the most informative spectral regions. The main limitation is that it requires arbitrarily choosing  
206 the number of groups into which to cluster the bands and identifying meaningful summary  
207 statistics to summarize the information clustered in the groups. We chose 15 groups of bands  
208 because given the limited number of individuals available per rare species, a smaller number of  
209 features is necessary to minimize model overfitting on train data. The number of groups was  
210 selected after exploring a range of possible values from 8 to 40. Fewer groups resulted in a loss  
211 of information and generally lower accuracy, while more groups did not significantly change  
212 model performance. Groups of bands were trained using pixels in the training data. Since the  
213 KLD clustering resulted in grouping bands from mostly contiguous and distinct spectral regions  
214 (though on the boundary of some groups of bands the bands put into each group was  
215 discontinuous), we chose the maximum, minimum and average reflectance as features to

216 measure the peak of reflectance, peak of absorption and average reflectance within each  
217 spectral region, which have been linked to leaf traits and vegetation properties (Artiola et al.,  
218 2004). This allowed us to reduce the 347 hyperspectral bands into 45 distinct features  
219 quantifying including information on the minimum, maximum and mean for each of 15 spectral  
220 regions (i.e., groups of bands).

### 221 2.3. Site effects

222 To provide the model with information on site location, which could reduce confusion  
223 across species that do not co-occur within a site but are characterized by similar spectral  
224 signatures, we included the latitude and longitude of the centroid of each site in the model. This  
225 approach incorporates information on the proximity of different sites and can be readily  
226 generalized to use outside of NEON. To help control for potential differences resulting from  
227 variation in sensor calibration of the specific flight missions, which would be specific to each  
228 site, we added a “site identifier” to the remote sensing features in the model. The site identifier  
229 consisted of the NEON site names (a nominal variable) transformed into real positive numbers  
230 by applying Leave-One-Out regression encoding, based on the correlation between the  
231 categorical variable (i.e. site name) and the species classes for each site([https://contrib.scikit-](https://contrib.scikit-learn.org/category_encoders)  
232 [learn.org/category\\_encoders](https://contrib.scikit-learn.org/category_encoders); Wright & König, 2019). The advantage of this approach over the  
233 more commonly used one-hot-encoder (i.e., adding a binary feature for each site in the dataset)  
234 is that it compresses the information into a single feature, which avoids undesired sparsity and  
235 potential overfitting due to a large number of encoded classes (27 in this study) (Rodriguez et  
236 al., 2018). We used data in the training set to fit the encoder and assigned its average value to  
237 each site category. The final model input for the general model was hyperspectral features,  
238 elevation, latitude and longitude and site. For the site-specific models, only spectral features  
239 and elevation were used.

240

## 241 2.4. Species classification

242 To assess whether a general model approach improves performance we built two sets of  
243 models: (1) a general model using data from all 27 NEON sites and (2) 27 separate models,  
244 each one using only the data from a single NEON site and covering a region of few hundred km<sup>2</sup>  
245 (hereafter referred to as site-specific models). For both the general and site-specific models, we  
246 performed species classification at the pixel level using an ensemble of five classifiers (Figure  
247 S.2): (1) a random forest classifier (Belgiu & Dragut, 2016), (2) a k-nearest neighbors classifier  
248 (Laaksonen & Oja, 1996), (3) a histogram gradient boosting classifier (Guryanov, 2019), (4) a  
249 fully connected multilayer perceptron (Pacifico et al., 2018), and (5) a bagging classifier with  
250 support vector machine as base estimators, using tools from the scikit-learn python package  
251 (Pedrosa et al., 2011). Details for each classifier can be found in supplementary materials  
252 (Supplement 1: classifiers). Ensemble-based approaches generally provide better performance  
253 and limit overfitting compared to using one classifier alone (Knauer et al., 2019). We chose the  
254 individual classifiers which form the ensemble because they have been shown to perform well  
255 for species classification on NEON data (Marconi et al., 2019). All predictors were normalized  
256 for model fitting by subtracting the mean and dividing by the standard deviation (i.e., setting the  
257 mean to zero and the standard deviation to 1). Parameters for all models and the ensemble  
258 were extracted by performing parameter tuning using cross validation.

259 We used entropy loss to measure the quality of tree-splits for random forests, categorical  
260 cross-entropy as the loss function for the histogram-gradient boosting, a radial basis function  
261 kernel to allow for a non-linear decision surface for the support vector classifiers, and the  
262 Manhattan distance for calculating the distance between k-nearest neighbors in the KNN  
263 classifier. We stacked these five pixel-based models by using the probability vectors produced  
264 by each classifier as features for a meta-ensemble elastic-net logistic model (Tang et al., 2015,  
265 Hui & Hastie, 2005). We chose this approach because logistic classifiers are easily interpretable

266 and use maximum likelihood to obtain estimates of the coefficients, returning as a result  
267 confidence scores that match the probability of a label-match and not just the single best  
268 predicted classification (Maddala, 1986), which is fundamental for assigning a reliable  
269 uncertainty score to each prediction. Pairing predictions to robust estimates of uncertainty is  
270 fundamental to increase the utility of remote sensing tree surveys for ecological analysis  
271 because it allows for (1) selecting trees and areas that meet or exceed minimum confidence in  
272 the derived measures for being used for scientific analyses, and (2) allows for cascading the  
273 uncertainty in predictions onto the results of analyses downstream (Dietze, 2017). Training the  
274 logistic meta-ensemble on calibrated scores from sub-classifiers offers an advantage over other  
275 modern algorithms, whose estimates of uncertainty do not match true probabilities and are not  
276 well calibrated to the output of interest (Guo et al., 2017, Mukhati et al. 2020).

277         One of the main challenges of species classification algorithms is the imbalance  
278 between number of individual samples for rare and common species, which can cause models  
279 to overfit to highly abundant classes. In our data set, the number of pixels per species ranged  
280 from 44-28000 and the number of individual trees per species ranged from 5-1000. We used  
281 SMOTETomek technique (Batista et al., 2003) to reduce the effects of species class  
282 imbalances in the training set. SMOTETomek consists of a combination of under and  
283 oversampling which resulted in roughly 1000 spectral signatures (pixels) per species. First, we  
284 undersampled pixels from the most abundant species using Tomek links, which removes noisy  
285 and borderline pixels (Tomek, 1976). Then, we used a SMOTE oversampling approach (Chawla  
286 et al., 2002) to create non-identical synthetic pixels for any species with fewer pixels than the  
287 majority class, thus balancing each class to roughly 1000 pixels each. No over-undersampling  
288 was applied to the test data. Because of the stratified design of the train-test split, most species  
289 and sites had a number of test trees proportional to their frequency in the original dataset. We  
290 also used the same train-test split to repeat the entire analysis once for each NEON site by

291 building and testing site-specific models built using only data from each particular site. Finally, to  
292 estimate which spectral regions are most important for separating conifers from broadleaf  
293 species, we repeated the entire analysis by substituting species with broader taxonomy classes  
294 (i.e., angiosperms vs gymnosperms).

## 295 2.5. Evaluation

296 We evaluated the performance of the models by training the model on 80% of the data  
297 and evaluating its performance on the remaining 20%. Since spatial autocorrelation across train  
298 and test data can lead to optimistic bias in classification (Millard & Richardson 2015), we placed  
299 all individuals within a plot together into either the training or testing data sets. A series of  
300 randomizations of the plots were performed to create an 80:20 split of individuals that optimized  
301 the number of species in the train and test data sets. For each randomization, we calculated the  
302 total number of species in the test set and repeated this random operation until we found the  
303 split which maintained the highest number of species from the original data in both train and test  
304 set. For the general model, the training data set contained 4210 individuals of 77 species and  
305 the test data set 1487 individuals of 72 species. Data for the 5 species missing from the test-set  
306 were collected only within plots selected for training, therefore no tree from these 5 species was  
307 suited or included in the held out testing data to minimize the effect of geographic  
308 autocorrelation on assessing accuracy (Karasiak, 2021). The resulting data represents 56% of  
309 the total tree species in the original unfiltered vegetation structure dataset and these species  
310 account for an average of 89% of individuals per site (Figure S.3).

311 Predictions for the species class of each individual in the test set were made using a 4x4  
312 clip centered on the location of the test stem. Model performance was then evaluated using  
313 overall accuracy, individual tree level (micro) and average species-level (macro) F1 scores  
314 (hereafter referred to as individual-level and species-level accuracy respectively). The F1 score  
315 combines precision and recall to provide a general measure of the overall accuracy of the

316 species classification, allowing for direct comparison between models using a single metric  
317 (Chinchor, 1992). For each site, F1 scores for the general model were compared to those  
318 produced by equivalent single site models to determine how the general model performed  
319 relative to the traditional single site approach. Scores and confusion matrices were calculated  
320 using the Caret package (Kuhn, 2008).

321       To understand the performance of the general model in different ecological contexts, we  
322 evaluated how performance varied across the United States, how performance correlated with  
323 the number of species being predicted at the NEON site, and which components of the model  
324 (site effect, elevation, geographic location, and hyperspectral reflectance) were most important  
325 for prediction. We used bootstrap features importance to quantify the relative importance of the  
326 different types of features, e.g., site identifier, site geolocation, hyperspectral reflectance and  
327 terrain elevation (Breiman, 2001). This approach is based on evaluating how the overall  
328 accuracy is affected by each individual feature. At every iteration, one feature is selected and  
329 the values are randomly shuffled among the samples, effectively removing the information held  
330 in it. The accuracy is recorded with the shuffled feature to determine the loss of performance  
331 compared to the unshuffled data. We used the same approach to quantify the relative  
332 importance of the 15 spectral regions in which we grouped the hyperspectral data.

333       We also evaluated the characteristics of trees and forests associated with the most  
334 confusion between species (i.e., misclassification) based on forest type (using the National Land  
335 Cover Database; Homer et al., 2001) and information from the NEON field data on canopy  
336 position, tree status, and growth form from the NEON field data. We also assessed spatial  
337 structure in confusion by determining, for every misclassified tree, whether the species to which  
338 it was incorrectly classified to also occurred in the same NEON field plot. Finally, since  
339 confusion commonly occurred within genera we also evaluated model performance for  
340 predicting genus instead of species.

## 341 2.6. Prediction

342 We generated predictions for individual trees at the landscape scale (~350 km<sup>2</sup>) by  
343 integrating our approach with individual tree detections from previous work (Weinstein et al.,  
344 2021). The Weinstein et al. (2021) dataset consists of 100 million individual tree crowns from 37  
345 NEON sites identified using a retinanet neural network object detector and represented by  
346 quadrangular polygons (i.e., bounding boxes) roughly representing the surface of the sunlit  
347 portion of the crown. For consistency between the approach used for training and testing the  
348 model (16-pixel clips), we extracted the pixels from the centroid of each estimated bounding  
349 box. First, we extracted a 4x4 square window of pixels around the centroid of each detection.  
350 For bounding boxes smaller than 16m<sup>2</sup>, we dropped the pixels falling outside the bounding  
351 boxes. Second, we filtered vegetation pixels from the background using the same procedure as  
352 applied to the training/test data set. We finally selected all pixels with uncertainty scores > 0.5 to  
353 be used to make predictions at the level of individual trees. We assigned each tree to a species  
354 class by averaging the probability vectors (i.e., probability that the pixel is assigned to any of the  
355 77 classes) of each pixel in the crown and selecting the species with the highest average  
356 probability. We assigned each individual-tree prediction an uncertainty score consisting of the  
357 average pixel probability, which ranged from 0-1.

## 358 3. Results

359 The general (cross-site) model yielded more accurate species classifications (larger F1  
360 scores) than site-level models for 13 (species-level F1) and 18 (individual-level F1) of the 27  
361 sites and identical accuracies for 5 (species-level F1) and 6 (individual-level F1) additional sites.  
362 There were only three sites that showed better site-level species-level and individual-level F1  
363 scores: Blandy Experimental Farm, Washington (BLAN) and Talladega National Forest,  
364 Alabama (TALL), and Jones Ecological Research Center, Georgia (JERC) (Figure 1, Figure S.



365 4, Figure S. 5). On average, the general model resulted in higher accuracy of individual tree  
366 level classification (increases in individual-level F1) from 0.70 to 0.77 and species-average  
367 accuracy (increases in species-level F1) from 0.46 to 0.54. Accuracy of the ensemble was  
368 higher than its sub-models trained singularly whose average site-level accuracy ranged  
369 between 0.09 and 1 species-level F1 and between 0.31 and 1 individual-level F1 (Figure S.7  
370 and Supplement 2 for detailed species level accuracies, site-level and general model confusion  
371 matrixes in Supplement 3, raw outputs available at <https://doi.org/10.5281/zenodo.5796142>),  
372 which is consistent with the general observation that ensemble-based approaches produce  
373 more accurate predictions (Healey et al., 2018). Since the general ensemble model proved to  
374 be the best performing approach in this study, we focus primarily on it from this point forward.

375 Our results show a link between classification accuracy and ecological properties such  
376 as ecosystem type, tree health, and growth form (Figure 2, Figure S.6). Damaged trees,  
377 including broken boles and other types of damage (but not diseased trees), exhibited higher  
378 rates of misclassification than healthy crowns (Figure 2), with broken boles exhibiting a 44%  
379 misclassification rate. The general model performed best in evergreen forests (~12%  
380 misclassification rate) and worst in wetlands (~38% misclassification rate), with deciduous  
381 forests falling in between (~30% misclassification rate). Average classification accuracy was  
382 higher in eastern forests compared to western forests (Figure 3a), and was negatively  
383 correlated with the number of species within the site (Figure 3b,d). The algorithm generally  
384 underperformed in the Prairie Peninsula and Central and Southern Plains ecoregions which are  
385 characterized by patches of closed forest at the edges of prairies or farmland (Figure 3a, Figure  
386 S.6). These results align with previous work in showing that classification from remote sensing  
387 is more challenging for more complex canopies, overlapping crowns, and coexisting species  
388 with similar life history and spectral properties (Heinzel & Koch 2016, Bioucas-Dias, 2013).

389           Roughly 80% of the information used by the algorithm for classifying species was from  
390 the hyperspectral reflectance (Figure 4). Important information was present across the entire  
391 spectrum, but our results show that some groups of bands in some spectral regions were more  
392 informative than others. Specifically, the most important spectral regions are the blue and green  
393 (0.450 to 0.550 nm) in the visible region, the red-edge in the near infrared (0.62 to 0.85), 1.15 to  
394 1.27 nm in SWIR1 and 1.62 to 1.68 nm in SWIR2. Spectral regions in the SWIR1, SWIR2, and  
395 red-edge were the most important also in classifying angiosperms vs gymnosperms. The site's  
396 coordinates, which represent the geographic locations of sites, explained 11% of total variation  
397 and were the second most important variable (Figure 4). Elevation, a proxy of potential local  
398 changes in the environment within each site, accounted for another 4%. The site effect, a proxy  
399 of other site level ancillary information (e.g., sensor calibration, flight and atmospheric  
400 conditions), only accounted for 3% of the total explained variance.

401           Comparing misclassification among species shows there is greater confusion for rare  
402 species, congeners, and species that co-occur within NEON field plots, and that model-  
403 estimated uncertainty accurately reflects confidence in the model prediction. All species  
404 performing poorly ( $F1 < 0.5$ ) belonged to taxa with low sample sizes (less than 50 trees for  
405 training) (Figure S6, Figure S7). In general, most of the confusion was among species co-  
406 occurring within plot (74%) and site (93%). A large amount of confusion also occurred among  
407 congeneric species (~27% of total misclassifications), mostly within pines, poplars, oaks and  
408 maples, which make up 57% of the test dataset (Figure S.9). Oaks, pines and poplars in  
409 particular accounted for ~87% of the total within-genus confusion, and most misclassifications  
410 had confidence scores  $>0.8$ . Aggregating predictions at the genus level improved the overall  
411 accuracy by 6% (individual-level  $F1$  accuracy of 83%), confirming that part of the confusion is  
412 embedded in physiological similarities across taxonomically related trees. Likewise, reducing  
413 tree classification into 2 plant functional types dramatically increased accuracy ( $F1 \sim 0.95$ ). The

414 model showed a fair ability in predicting 5 of 9 species tested in sites where no data was used  
415 for that particular species in the training set. For these trees, the average individual-level F1 of  
416 ~0.69 and average species accuracy of 0.47, but accuracy varied largely across taxa, with  
417 better results for needleleaf species (individual-level F1 ~0.825, species-level F1 ~ 0.71)  
418 compared to broadleaf species (individual-level F1 ~0.44, species-level F1 ~0.27). The model  
419 produced reliable estimates of uncertainty for all species regardless of the accuracy. Uncertainty  
420 scores matched closely with the probability of correct classification ( $R^2$  =of 0.89, Figure 5).  
421 Leveraging crown-data predictions, the model was tested to produce fair species predictions for  
422 millions of trees per NEON site (Figure 6).

## 423 **4. Discussion**

424 Using a single general model that integrated data from plots across a continental scale  
425 resulted in more accurate classification of tree species identity from remote sensing data than  
426 building separate models for individual sites. The more accurate classification occurred despite  
427 the continental data set containing samples from many different forest types, structures, and  
428 species compositions across 27 sites. This suggests that the benefits of increasing the number  
429 of samples for less common species and more fully characterizing within-species variance  
430 outweighs the costs associated with including species that do not overlap geographically and  
431 including components of within-species variance not observed at individual sites (Figure 1). To  
432 our knowledge this is the first study which developed a generalized model for species  
433 classification of individual tree crowns across multiple biomes. The success of the general  
434 model here suggests that developing generalized algorithms offers a potential step forward in  
435 species classification from remote sensing more broadly. Our model resulted in better cross-site  
436 classification compared to other approaches in literature (e.g., Castro-Esau et al. 2006) possibly  
437 because of the wider spectral range available from NEON hyperspectral images (445 - 2500 vs

438 445 - 950 nm), as suggested by the strong contribution of reflectance from 950 to 2500 nm to  
439 our generalized model (Figure 4). Also, better cross-site transferability of species classification  
440 may be related to the models used in the ensemble. Our model included methods like the  
441 gradient boosting classifier, which proved to be among the most robust for cross-site  
442 transferability of species classification (Graves et al., 2021). Our generalized approach  
443 leveraged the information from multiple locations, biomes, and survey efforts, increasing the  
444 number of individuals from rarely sampled or highly variable classes and allowing models to  
445 learn more broadly about how to distinguish species in the taxonomic group of interest. In  
446 addition to yielding improved predictions, generalized cross-site approaches can potentially  
447 generate predictions for a wide range of ecosystems, including those with limited or no training  
448 data, allowing other studies to leverage the same shared model and thereby facilitating large-  
449 scale ecological research (Weinstein et al. 2021).

450 By providing classification of the most common tree species in the canopy, the results of  
451 this model are potentially useful for several ecological applications, such as mapping biomass  
452 and modeling carbon, energy and water flux. Our model included species making up ~80% of  
453 the individual trees in the upper canopy when all sites are taken together. The fraction, however,  
454 varied among sites. Furthermore, given the stratified sampling of the NEON vegetation structure  
455 data used to develop the generalized model, the model is likely to capture the major vegetation  
456 types and most common species at each site. Canopy trees, which are visible from optical  
457 remote sensing devices, represent the majority of biomass in forests (Lutz et al., 2012).  
458 Because they form the interface between the atmosphere and land surface, the canopy layer  
459 also is particularly important for water and energy flux (Paul-Limogens et al., 2017). Because  
460 carbon storage, water and energy flux can vary among species (Wright et al., 2006), the ability  
461 to map the location and coverage of canopy species is important for assessing these important  
462 ecosystem characteristics. Other ecological applications, such as assessing total forest species

463 richness, and quantifying tree regeneration, cannot be addressed using the model because our  
464 model could not classify rare canopy species or understory individuals,

465         One of the main challenges in developing models that generalize well across the  
466 continent is overcoming differences across sites in factors including seasonality, background,  
467 and sensor calibration (Hesketh & Sanchez-Azofeifa, 2012, Clark et al., 2005, Pu, 2021). To  
468 quantify the sensitivity of the algorithm to this ancillary information, we evaluated the relative  
469 importance of the site-effect features compared to reflectance, geography and elevation. Our  
470 results showed that the relative importance of the site-effect is marginal and accounts for less  
471 than 3% of the total information captured (Figure 4). This suggests that the spectral signal from  
472 NEON data is comparable across different flights and that flight-specific noise can be minimized  
473 using BRDF corrections and vector normalization to limit the impact on the accuracy of  
474 generalized algorithms. This is due in part to NEON data being highly standardized and using  
475 the same image pre-processing protocol across the entire network (Kampe et al., 2014). NEON  
476 remote sensing data is also collected at the peak of vegetation productivity for each site,  
477 reducing the confounding effect of different phenological stages for species occurring at multiple  
478 sites (Gartner et al., 2016). Expanding large scale surveys outside the NEON network would  
479 require integrating information from less standardized sources, raising new challenges related to  
480 fusion of sensors that are not cross-calibrated and images collected in different seasons (Brook  
481 & Ben-Dor, 2015, Zou et al., 2018). Further investigation is therefore fundamental to evaluating  
482 whether our findings apply to applications that involve integrating multiple sensors, missions, or  
483 resolutions.

484         Clustering adjacent bands in the electromagnetic spectrum using KLD facilitated  
485 evaluating tree attributes, such as leaf chemistry, that may allow spectral separation of different  
486 species. The phylogenetic conservation of these attributes may help explain why a large part of  
487 the confusion in species classification was for congeneric species (Cavender-Bares et al.,

488 2016). Our results indicating important spectral regions support patterns shown in previous  
489 work, including (a) reflectance in the red edge (Curran et al., 1995), (b) 450-475 nm (Kira et al.,  
490 2015), and (c) the SWIR around 1200 nm (Li et al., 2021), 1600 nm and 2000 nm (Kokaly et al.,  
491 2015). The importance of the 450-475 nm region may be linked to carotenoids and chlorophyll  
492 content, with chlorophyll content generally lower in needleleaf species (Croft et al., 2020) and  
493 carotenoids varying across different environments (Valiente et al., 2015). Reflectance in red-  
494 edge can be related to leaf age, chlorophyll, and pigment concentration (Gitelson et al., 1996)  
495 that vary widely among species (Cavender-Bares et al., 2016). Reflectance in the 1200 nm was  
496 previously linked to equivalent water thickness (Li et al., 2021), a key functional trait for  
497 classifying species in temperate biomes (Shi et al., 2018), or distinguishing early to late  
498 succession species (Feret et al., 2019, Wright et al., 2004). Reflectance in SWIR at 1600 and  
499 2000 nm can be linked to leaf phenolics (Kokaly et al., 2015), tannins and secondary  
500 metabolites (Couture et al., 2016), proxies of leaf toughness and structure across species. The  
501 link between water thickness, toughness and structure may also explain why the regions in  
502 1200 nm and 1600 nm are the two most important in distinguishing broadleaf from needleleaf  
503 species.

504         The dimensionality reduction algorithm used in this study identified groups of adjacent  
505 bands in relatively discrete spectral regions that overlap with spectral regions used in  
506 multispectral satellites, supporting the idea that multispectral satellite sensors can access a  
507 large amount of spectral information for species classification (Laurin et al., 2016).  
508 Hyperspectral satellite data is still limited to few prototype datasets with relatively low spatial  
509 resolution (Loizzo et al., 2018, Diaz et al., 2018, Bogan et al., 2019), compared to multispectral  
510 satellites with sub-meter resolution (e.g. WorldView3). Our results show that most of the  
511 information required for species classification across NEON sites overlap with WorldView3

512 satellite multispectral bands supporting that species identification at the tree and plot level with  
513 satellite data is feasible (Immitzer et al., 2012, Hartling et al., 2019, Ferreira et al., 2019).

514         One of the advantages to broad scale general models is that they allow assessment of  
515 how different ecological and environmental conditions influence the accuracy of the species  
516 classification. Understanding variation in model performance across space, forest types, and  
517 taxa is fundamental to better understanding where and when these models can be applied and  
518 improvement of large-scale surveys from remote sensing. In our analysis, eastern US forests  
519 showed lower accuracy compared to western ecosystems. We believe this is at least partly  
520 because eastern ecosystems are characterized by a higher species diversity of canopy trees as  
521 well as crown geometry that makes aligning stems to crowns more difficult compared to western  
522 conifer stands (Figure 2, 3, S.6). Higher species diversity in eastern forests (mean species per  
523 site ~15) compared to western forests (mean species diversity per site ~4), inherently makes  
524 classification tasks more challenging due to larger numbers of classes typically resulting in  
525 lower accuracy predictions (Takahashi et al., 2020). Continuous closed canopies also increase  
526 the likelihood pixels selected in a window centered on the stem will be from neighboring tree  
527 crowns. This is due to the difficulty of obtaining accurate GPS points of stems in closed canopy  
528 (Rodriguez-Perez et al., 2007), as well as the increased likelihood of sunlit portions of the crown  
529 being displaced from the stem location in continuous broadleaf forests (Strigul et al., 2008). This  
530 is a common problem, since field surveys often provide only the geographic coordinates of tree  
531 stems and lack information about crown position or size, making it very challenging to correctly  
532 align crown borders with species labels. For example, pixel mislabeling may be one of the  
533 reasons why our classifier was weaker at sites in the Great Plains region (e.g., the NEON sites  
534 of Lyndon B. Johnson National Grasslands, CLBJ and University of Kansas Field Station,  
535 UKFS), where patches of grasslands alternate with dense forests characterized by multiple oak  
536 species forming a complex mosaic of crowns that may not be located directly above their stem



537 locations. In contrast, conifers in western US forests tend to be dominated by species  
538 characterized by apical dominance (e.g., aspens and firs) with crowns centered directly above  
539 the main stem, reducing pixel mislabeling and improving classification. Finally, savannas, such  
540 as the San Joaquin Experimental Range (SJER), characterized by isolated trees of few species  
541 (mostly broadleaved), may be less likely to suffer from confounding effects like crown  
542 displacement and stem-crown misalignment, making them less prone to spectral mixing or  
543 potential pixel-mislabeling (Heinzel & Koch, 2012). The most challenging ecosystem type in our  
544 analysis, wetlands, combines all of these challenges. Species like *Carpinus caroliniana* and  
545 *Betula papyrifera*, found often in plots from wetland ecosystems, were among the species with  
546 the worst classification accuracy, partly because they are generally smaller trees that can occur  
547 in the understory, grow in closed canopies in the overstory (e.g., an average dbh ~16.5 cm and  
548 average height of ~10 m), and often include limited training samples because they are mostly  
549 found in riparian ecosystems which make up a small fraction of the landscapes from the NEON  
550 sites included in this study (less than 50 individuals per species). Because of these challenges,  
551 the accuracy of the species predictions needs to be assessed depending on the site and  
552 ecosystem types within sites to ensure it is sufficient for the intended ecological application.

553       Because species predictions from remote sensing are imperfect, it is important that  
554 classification models produce robust estimates of uncertainty to allow this uncertainty to be  
555 propagated through ecological analyses and considered during decision making. This is  
556 particularly important when generating large numbers of predictions at large scales, because  
557 this will result in including species located in undersampled areas and challenging ecosystems  
558 as well as species that are difficult to classify due to rarity or similarity to other closely related  
559 species. Our results confirmed that stacking scores from different classifiers using a logistic  
560 regression produces accurate estimation of classification uncertainty (Figure 6).



561           While our generalized approach resulted in significant improvements over site-level  
562 models, it is important to recognize that the accuracy of this approach is still insufficient for  
563 ecological analyses contingent on rare or untrained species. For example, biodiversity patterns  
564 are often driven by rare species (Leitao et al., 2016, Mouilllot et al., 2013), which are the most  
565 challenging taxa for species classification, especially species so rare that they cannot be  
566 included in the model due to data limitations ( $n < 5$  individual trees in this study). Extrapolating  
567 outside of NEON sites, a goal for general models, would also result in the presence of additional  
568 species missing from the field dataset, restricting the range of ecological analyses to species  
569 sampled within the footprint of NEON sites. Some of these limitations may be mitigated by  
570 classifying trees into higher level taxonomic levels. In this study we observed that misclassified  
571 trees were generally limited to species in the same genus and species co-occurring in the same  
572 plot (Figure S.9, Figure S.10, Figure S.11, Supplement 3). Oaks, pines, and poplars in particular  
573 accounted for ~87% of the total within genus confusion. One possible driver of confusion among  
574 oak species is their similar physiological and spectral characteristics (Figure S.12). Some co-  
575 occurring oaks species like *Quercus alba* and *Quercus stellata* can also cross-breed and  
576 therefore be physiologically very similar (Hardin, 1975), making them particularly hard to  
577 distinguish from imagery. For these reasons, most of the cases leading to misclassification  
578 resulted from within-genus confusion. This implies that uncertainty can be significantly reduced  
579 by aggregating predictions to the genus level, offering a more robust solution for large scale  
580 ecological applications that can be successfully addressed by accurately classifying trees at the  
581 level of genus, families, or plant functional type. For example, earth system models use plant  
582 functional types as the taxonomic unit for quantifying carbon dynamics at continental to global  
583 scale (Lawrence et al., 2019), large scale fire risk assessment and management can be  
584 achieved by using genus level surveys of the most dominant taxa (Ma et al., 2021), and patterns  
585 of forest biomass largely depend on which taxa dominate the ecosystem (Cheng et al., 2018).

586 An increase in taxonomic level also reduces issues with applying general models beyond the  
587 training data (e.g., outside of NEON sites) because it is much more likely that all genera or  
588 families have been sampled in the training data.

589 Building generalized algorithms provides an approach to overcome the significant field  
590 data limitations present in most remote sensing tasks in ecology, by allowing pooling data from  
591 ever growing sources of spatially explicit field surveys and high-resolution remote sensing  
592 imagery. Our results showed that by integrating field surveys from dozens of NEON sites, it is  
593 possible to produce a general model that provides improvements over single-site models for  
594 species classification, with good estimates of uncertainty, and the ability to increase accuracy  
595 further by aggregating predictions at the genus level. This general approach also unlocks the  
596 potential for making predictions outside of NEON sites. The ultimate goal is to develop general  
597 models that can be used anywhere in the region of interest (in our case the United States).  
598 Using only NEON data, we successfully built a single integrated classifier that includes 20% of  
599 all tree species found in forest ecosystems across the US (n=77 out of 396 surveyed by the  
600 United States Forest Inventory and Analysis project; appendix F; Woudenberg, et al., 2010).

601 Beyond NEON, more and more openly available field, multispectral and hyperspectral  
602 datasets are being released from aerial (airborne and UAV) and satellite missions worldwide  
603 (Cook et al., 2013, Vangi et al., 2021, Claverie et al., 2018). Our results show that instead of  
604 training hundreds of separate models for local applications, there is the potential for integrating  
605 field and remote sensing collections from multiple locations and sources to build general models  
606 with improved accuracy for a broader range of landscapes and geographic locations.  
607 Leveraging the broad geographic distribution of NEON sites and the overlapping information  
608 held by multispectral and hyperspectral imaging, our results also suggest the potential for linking  
609 different data sources to unlock the ability of scaling species classification of individual trees  
610 beyond NEON. For example, future work could focus on developing approaches for bridging the

611 information held in hyperspectral data (sparsely acquired, high radiometric resolution) to the  
612 ever-growing pool of high-resolution multispectral and RGB + NIR data (e.g. National  
613 Agriculture Imagery Program data) available for a broad geographic continuum across the US.  
614 Further integration with more field and remote sensing datasets could potentially provide remote  
615 sensing-based surveys of hundreds of millions of trees, making it possible to investigate the  
616 properties of ecosystems from local to continental scales.

## 617 5. Conclusions

618 Remote sensing is facing a revolution in the quality of data and accuracy of methods,  
619 making it a good candidate for developing applications to survey species and forest properties  
620 at large spatial extents. Leveraging data collected from NEON across the US, we demonstrated  
621 that building continental scale algorithms for generalized species classification offers several  
622 advantages over the more traditional site level applications. Despite being very high for  
623 dominant taxa, accuracy in predictions for less represented species can be taunted by  
624 limitations in field-to-image misalignment, the number of species and individuals from rarely  
625 sampled taxa, making surveys from remote sensing unsuited to date for analyzing patterns in  
626 species alpha diversity at scale. Yet, building generalized algorithms is a fundamental  
627 cornerstone to overcome these limitations, because it allows for pooling from ever growing  
628 sources of geo-explicit field surveys and high-resolution remote sensing imagery. Our results  
629 showed that by integrating field surveys with NEON airborne data, it is possible already to  
630 generate highly accurate predictions at the genus level and overall good estimates of  
631 uncertainty for individual trees. This allows for generating surveys of hundreds of millions of  
632 individual crowns across the continent, unlocking the potential for investigating large scale  
633 ecological applications focusing on the sun-exposed part of the canopy, dominant species,  
634 genres or functional types.

## 635 Acknowledgements

636 This work was supported by the Gordon and Betty Moore Foundation's Data-Driven  
637 Discovery Initiative through grant GBMF4563 to E. P. White and by the National Science  
638 Foundation through grant 1926542 to E. P. White, S. A. Bohlman, A. Zare, D. Z. Wang, and A.  
639 Singh; by the NSF Dimension of Biodiversity program grant (DEB-1442280) and USDA/NIFA  
640 McIntire-Stennis program (FLA-FOR-005470) to S. A. Bohlman; by the University of Florida  
641 Biodiversity Institute (UFBI) and Informatics Institute (UFII) Graduate Fellowship to Sergio  
642 Marconi. There was no additional external funding received for this study.

643 All confusion matrixes can be found in the supplementary material. All data can be found  
644 in the following Zenodo archive: <https://doi.org/10.5281/zenodo.5796143>. All code for data  
645 preprocessing, model training and testing and analyses can be found in the following GitHub  
646 repo: [https://github.com/MarconiS/Continental-scale-Hyperspectral-tree-species-classification-](https://github.com/MarconiS/Continental-scale-Hyperspectral-tree-species-classification-in-the-National-Ecological-Observatory-N)  
647 [in-the-National-Ecological-Observatory-N](https://github.com/MarconiS/Continental-scale-Hyperspectral-tree-species-classification-in-the-National-Ecological-Observatory-N)

## 648 References

- 649 Ab Majid, Ibtisam, Zulkiflee Abd Latif, and Nor Aizam Adnan. "Tree species classification using  
650 worldview-3 data." 2016 7th IEEE Control and System Graduate Research Colloquium  
651 (ICSGRC). IEEE, 2016.
- 652 Anderson□Teixeira, K.J., Davies, S.J., Bennett, A.C., Gonzalez□Akre, E.B., Muller□Landau,  
653 H.C., Joseph Wright, S., Abu Salim, K., Almeyda Zambrano, A.M., Alonso, A., Baltzer,  
654 J.L. and Basset, Y., 2015. CTF□ForestGEO: a worldwide network monitoring forests in  
655 an era of global change. *Global change biology*, 21(2), pp.528-549.
- 656 Anderson, C.B. "Biodiversity monitoring, earth observations and the ecology of scale." *Ecology*  
657 *letters* 21.10 (2018): 1572-1585.

658 Artiola, Janick F., Mark L. Brusseau, and Ian L. Pepper. Environmental monitoring and  
659 characterization. Academic Press, 2004.

660 Ayrey, E., et al. "Synthesizing Disparate LiDAR and Satellite Datasets through Deep Learning to  
661 Generate Wall-to-Wall Regional Forest Inventories." *BioRxiv* (2019): 580514.

662 Ballanti, Laurel, et al. "Tree species classification using hyperspectral imagery: A comparison of  
663 two classifiers." *Remote Sensing* 8.6 (2016): 445.

664 Bastin, J.F., et al. "The global tree restoration potential." *Science* 365.6448 (2019): 76-79.

665 Belgiu, Mariana, and Lucian Drăguț. "Random forest in remote sensing: A review of applications  
666 and future directions." *ISPRS journal of photogrammetry and remote sensing* 114  
667 (2016): 24-31.

668 Bioucas-Dias, José M., et al. "Hyperspectral remote sensing data analysis and future  
669 challenges." *IEEE Geoscience and remote sensing magazine* 1.2 (2013): 6-36.

670 Breiman, Leo. "Random forests." *Machine learning* 45.1 (2001): 5-32.

671 Brook, Anna, and Eyal Ben-Dor. "Supervised vicarious calibration (SVC) of multi-source  
672 hyperspectral remote-sensing data." *Remote Sensing* 7.5 (2015): 6196-6223.

673 Castro-Esau, K.L., Sánchez-Azofeifa, G.A., Rivard, B., Wright, S.J., Quesada, M. 2006.

674 Cavender-Bares, J., J. E. Meireles, J. J. Couture, M. A. Kaproth, C. C. Kingdon, et al. 2016.  
675 Associations of leaf spectra with genetic and phylogenetic variation in oaks: Prospects  
676 for remote detection of biodiversity. *Remote Sensing* 8 : 475-

677 Chawla, Nitesh V., et al. "SMOTE: synthetic minority over-sampling technique." *Journal of*  
678 *artificial intelligence research* 16 (2002): 321-357.

679 Cheng, Yanxia, et al. "Biomass-dominant species shape the productivity-diversity relationship in  
680 two temperate forests." *Annals of Forest Science* 75.4 (2018): 1-9.

681 Chinchor, N. "MUC-4 evaluation metrics in Proc. of the Fourth Message Understanding  
682 Conference 22–29." (1992).

- 683 Claverie, Martin, et al. "The Harmonized Landsat and Sentinel-2 surface reflectance data set."  
684 Remote Sensing of Environment 219 (2018): 145-161.
- 685 Cook, Bruce D., et al. "NASA Goddard's LiDAR, hyperspectral and thermal (G-LiHT) airborne  
686 imager." Remote Sensing 5.8 (2013): 4045-4066
- 687 Couture, J.J.; Singh, A.; Rubert-Nason, K.F.; Serbin, S.P.; Lindroth, R.L.; Townsend, P.A.  
688 Spectroscopic determination of ecologically relevant plant secondary metabolites.  
689 Methods in Ecology and Evolution 2016, 7, 1402-1412, doi:10.1111/2041-210X.12596
- 690 Curran, P.J.; Windham, W.R.; Gholz, H.L. Exploring the relationship between reflectance red  
691 edge and chlorophyll concentration in slash pine leaves. Tree Physiol 1995, 15, 203-  
692 206, doi:10.1093/treephys/15.3.203.
- 693 Delicado, Pedro. "Dimensionality reduction when data are density functions." Computational  
694 Statistics & Data Analysis 55.1 (2011): 401-420.
- 695 Diaz, E., Green, R., Hook, S., Johnson, B., Sullivan, P., & Mercury, M. (2018). 2018 HypsIRI  
696 Mission Concept Study: VSWIR, TIR, IPM: Separate and Contemporaneous With  
697 Current Technology.
- 698 Dietze, Michael C. "Prediction in ecology: A first-principles framework." Ecological Applications  
699 27.7 (2017): 2048-2060.
- 700 Engler, Robin, et al. "Combining ensemble modeling and remote sensing for mapping individual  
701 tree species at high spatial resolution." Forest Ecology and Management 310 (2013): 64-  
702 73.
- 703 Fassnacht, Fabian Ewald, et al. "Review of studies on tree species classification from remotely  
704 sensed data." Remote Sensing of Environment 186 (2016): 64-87.
- 705 Ferreira, Matheus Pinheiro, et al. "Tree species classification in tropical forests using visible to  
706 shortwave infrared WorldView-3 images and texture analysis." ISPRS journal of  
707 photogrammetry and remote sensing 149 (2019): 119-131.

- 708 Fricker, G. A., Ventura, J. D., Wolf, J. A., North, M. P., Davis, F. W., & Franklin, J. (2019). A  
709 convolutional neural network classifier identifies tree species in mixed-conifer forest from  
710 hyperspectral imagery. *Remote Sensing*, 11(19), 2326.
- 711 G. Batista, B. Bazzan, M. Monard, "Balancing Training Data for Automated Annotation of  
712 Keywords: a Case Study," In WOB, 10-18, 2003.
- 713 Gärtner, Philipp, Michael Förster, and Birgit Kleinschmit. "The benefit of synthetically generated  
714 RapidEye and Landsat 8 data fusion time series for riparian forest disturbance  
715 monitoring." *Remote Sensing of Environment* 177 (2016): 237-247.
- 716 Grabska Ewa, David Frantz, Katarzyna Ostapowicz, Evaluation of machine learning algorithms  
717 for forest stand species mapping using Sentinel-2 imagery and environmental data in the  
718 Polish Carpathians, *Remote Sensing of Environment*, Volume 251, 2020.
- 719 Guo, Chuan, et al. "On calibration of modern neural networks." *International Conference on*  
720 *Machine Learning*. PMLR, 2017.
- 721 Guryanov, Aleksei. "Histogram-based algorithm for building gradient boosting ensembles of  
722 piecewise linear decision trees." *International Conference on Analysis of Images, Social*  
723 *Networks and Texts*. Springer, Cham, 2019.
- 724 Hardin, James W. "Hybridization and introgression in *Quercus alba*." *Journal of the Arnold*  
725 *Arboretum* 56.3 (1975): 336-363.
- 726 Hartling, Sean, et al. "Urban tree species classification using a WorldView-2/3 and LiDAR data  
727 fusion approach and deep learning." *Sensors* 19.6 (2019): 1284.
- 728 Healey, Sean P., et al. "Mapping forest change using stacked generalization: An ensemble  
729 approach." *Remote Sensing of Environment* 204 (2018): 717-728.
- 730 Heinzl, Johannes, and Barbara Koch. "Investigating multiple data sources for tree species  
731 classification in temperate forest and use for single tree delineation." *International*  
732 *Journal of Applied Earth Observation and Geoinformation* 18 (2012): 101-110.

- 733 Henrys, Peter A., and Susan G. Jarvis. "Integration of ground survey and remote sensing  
734 derived data: Producing robust indicators of habitat extent and condition." *Ecology and*  
735 *evolution* 9.14 (2019): 8104-8112.
- 736 Hesketh, Michael, and G. Arturo Sánchez-Azofeifa. "The effect of seasonal spectral variation on  
737 species classification in the Panamanian tropical forest." *Remote Sensing of*  
738 *Environment* 118 (2012): 73-82.
- 739 Homer, Collin, et al. "Development of a 2001 national land-cover database for the United  
740 States." *Photogrammetric Engineering & Remote Sensing* 70.7 (2004): 829-840.
- 741 Immitzer, Markus, Clement Atzberger, and Tatjana Koukal. "Tree species classification with  
742 random forest using very high spatial resolution 8-band WorldView-2 satellite data."  
743 *Remote sensing* 4.9 (2012): 2661-2693.
- 744 Kampe, T., et al. "NEON imaging spectrometer geolocation processing algorithm theoretical  
745 basis document." NEON Doc.# 001290 Rev A (2014).
- 746 Kandare, K., et al. "Prediction of species-specific volume using different inventory approaches  
747 by fusing airborne laser scanning and hyperspectral data." *Remote Sensing* 9.5 (2017):  
748 400.
- 749 Karasiak, Nicolas, et al. "Spatial dependence between training and test sets: another pitfall of  
750 classification accuracy assessment in remote sensing." *Machine Learning* (2021): 1-26.
- 751 Kira, O., Linker, R., Gitelson, A. Non-destructive estimation of foliar chlorophyll and carotenoid  
752 contents: Focus on informative spectral bands. *International Journal of Applied Earth*  
753 *Observation and Geoinformation* 38 (2015) 251-260
- 754 Knauer, Uwe, et al. "Tree species classification based on hybrid ensembles of a convolutional  
755 neural network (CNN) and random forest classifiers." *Remote Sensing* 11.23 (2019):  
756 2788.



- 757 Kokaly, R.F. & Skidmore, A.K. (2015) Plant phenolics and absorption features in vegetation  
758 reflectance spectra near 1.66 um. *International Journal of Applied Earth Observation and*  
759 *Geoinformation*, 43, 55-83.
- 760 Krause, Keith S., et al. "Early algorithm development efforts for the National Ecological  
761 Observatory Network Airborne Observation Platform imaging spectrometer and  
762 waveform lidar instruments." *Imaging Spectrometry XVI*. Vol. 8158. International Society  
763 for Optics and Photonics, 2011.
- 764 Kuhn, M. (2008). Building predictive models in R using the caret package. *Journal of statistical*  
765 *software*, 28, 1-26.
- 766 Laaksonen, Jorma, and Erkki Oja. "Classification with learning k-nearest neighbors."  
767 *Proceedings of International Conference on Neural Networks (ICNN'96)*. Vol. 3. IEEE,  
768 1996.
- 769 Laurin, Gaia Vaglio, et al. "Discrimination of tropical forest types, dominant species, and  
770 mapping of functional guilds by hyperspectral and simulated multispectral Sentinel-2  
771 data." *Remote Sensing of Environment* 176 (2016): 163-176.
- 772 Lawrence, David M., et al. "The Community Land Model version 5: Description of new features,  
773 benchmarking, and impact of forcing uncertainty." *Journal of Advances in Modeling*  
774 *Earth Systems* 11.12 (2019): 4245-4287.
- 775 Lawrence, M., et al. "Comparisons of national forest inventories." *National forest inventories*.  
776 Springer, Dordrecht, 2010. 19-32.
- 777 Leitão RP, Zuanon J, Villeger S, Williams SE, Baraloto C, Fortunel C, Mendonça FP,  
778 Mouillot D. 2016 Rare species contribute disproportionately to the functional structure of  
779 species assemblages. *Proc. R. Soc. B* 283: 20160084.  
780 <http://dx.doi.org/10.1098/rspb.2016.0084>

- 781 Li, Wei, et al. "Locality-preserving dimensionality reduction and classification for hyperspectral  
782 image analysis." *IEEE Transactions on Geoscience and Remote Sensing* 50.4 (2011):  
783 1185-1198.
- 784 Loizzo, R., et al. "PRISMA: The Italian hyperspectral mission." *IGARSS 2018-2018 IEEE*  
785 *International Geoscience and Remote Sensing Symposium*. IEEE, 2018.
- 786 Lutz, James A., et al. "Ecological importance of large-diameter trees in a temperate mixed-  
787 conifer forest." *PloS one* 7.5 (2012): e36131.
- 788 M. L. Clark, D. A. Roberts, and D. B. Clark, "Hyperspectral discrimination of tropical rain forest  
789 tree species at leaf to crown scales," *Remote Sensing of Environment*, vol. 96, no. 3–4,  
790 pp. 375–398, 2005.
- 791 Ma, Wu, et al. "Assessing climate change impacts on live fuel moisture and wildfire risk using a  
792 hydrodynamic vegetation model." *Biogeosciences* (2021).
- 793 Maddala, Gangadharrao S. *Limited-dependent and qualitative variables in econometrics*. No. 3.  
794 Cambridge university press, 1986.
- 795 Marconi, Sergio, et al. "Rethinking the fundamental unit of ecological remote sensing:  
796 Estimating individual level plant traits at scale." *bioRxiv* (2019): 556472.
- 797 Martins, Gabriela Barbosa, et al. "Deep learning-based tree species mapping in a highly diverse  
798 tropical urban setting." *Urban Forestry & Urban Greening* 64 (2021): 127241.
- 799 Mäyrä, Janne, et al. "Tree species classification from airborne hyperspectral and LiDAR data  
800 using 3D convolutional neural networks." *Remote Sensing of Environment* 256 (2021):  
801 112322.
- 802 Michałowska, Maja, and Jacek Rapiński. "A review of tree species classification based on  
803 airborne LiDAR data and applied classifiers." *Remote Sensing* 13.3 (2021): 353.
- 804 Modzelewska, A.; Fassnacht, F. E.; Stereńczak, K. (2020). Tree species identification within an  
805 extensive forest area with diverse management regimes using airborne hyperspectral

806 data. International journal of applied earth observation and geoinformation, 84, Art.-Nr.  
807 101960.

808 Modzelewska, A.; Kamińska, A.; Fassnacht, F. E.; Stereńczak, K. (2021). Multitemporal  
809 hyperspectral tree species classification in the Białowieża Forest World Heritage site.  
810 Forestry. doi:10.1093/forestry/cpaa048

811 Mouillot D, Bellwood DR, Baraloto C, Chave J, Galzin R, et al. Rare Species Support Vulnerable  
812 Functions in High-Diversity Ecosystems. PLoS Biology, 2013 DOI:  
813 10.1371/journal.pbio.1001569

814 Mukhoti, Jishnu, et al. "Calibrating deep neural networks using focal loss." arXiv preprint  
815 arXiv:2002.09437 (2020).

816 NEON (National Ecological Observatory Network). Spectrometer orthorectified surface  
817 directional reflectance - mosaic, RELEASE-2021 (DP3.30006.001).  
818 <https://doi.org/10.48443/qeae-3x15>. Dataset accessed from <https://data.neonscience.org>  
819 on March 7, 2021

820 Nezami, Somayeh, et al. "Tree species classification of drone hyperspectral and RGB imagery  
821 with deep learning convolutional neural networks." Remote Sensing 12.7 (2020): 1070.

822 Pacifico, Luciano DS, Valmir Macario, and Joao FL Oliveira. "Plant classification using artificial  
823 neural networks." 2018 International Joint Conference on Neural Networks (IJCNN).  
824 IEEE, 2018.

825 Paul-Limoges, Eugénie, et al. "Below-canopy contributions to ecosystem CO2 fluxes in a  
826 temperate mixed forest in Switzerland." Agricultural and Forest Meteorology 247 (2017):  
827 582-596.

828 Pax-Lenney, Mary, et al. "Forest mapping with a generalized classifier and Landsat TM data."  
829 Remote Sensing of Environment 77.3 (2001): 241-250.

- 830 Pecl, G.T., Araújo, M.B., Bell, J.D., Blanchard, J., Bonebrake, T.C., Chen, I.C., Clark, T.D.,  
831 Colwell, R.K., Danielsen, F., Evengård, B. and Falconi, L., 2017. Biodiversity  
832 redistribution under climate change: Impacts on ecosystems and human well-being.  
833 Science, 355(6332), p.eaai9214.
- 834 Pedregosa, Fabian, et al. "Scikit-learn: Machine learning in Python." the Journal of machine  
835 Learning research 12 (2011): 2825-2830.
- 836 Prasad and L. M. Bruce, "Limitations of Principal Components Analysis for Hyperspectral  
837 Target Recognition," in IEEE Geoscience and Remote Sensing Letters, vol. 5, no. 4, pp.  
838 625-629, Oct. 2008, doi: 10.1109/LGRS.2008.2001282.
- 839 Pu, Ruiliang. "Mapping Tree Species Using Advanced Remote Sensing Technologies: A State-  
840 of-the-Art Review and Perspective." Journal of Remote Sensing 2021 (2021).
- 841 Qian, M. Ye and J. Zhou, "Hyperspectral image classification based on structured sparse  
842 logistic regression and three-dimensional wavelet texture features", IEEE Trans. Geosci.  
843 Remote Sens., vol. 51, no. 4, pp. 2276-2291, Apr. 2013.
- 844 Rana, Parvez, et al. "Towards a generalized method for tree species classification using  
845 multispectral airborne laser scanning in Ontario, Canada." IGARSS 2018-2018 IEEE  
846 International Geoscience and Remote Sensing Symposium. IEEE, 2018.
- 847 Rodríguez-Pérez, José R., M. F. Álvarez, and Enoc Sanz-Ablanedo. "Assessment of low-cost  
848 GPS receiver accuracy and precision in forest environments." Journal of Surveying  
849 Engineering 133.4 (2007): 159-167.
- 850 Sagi, Omer, and Lior Rokach. "Ensemble learning: A survey." Wiley Interdisciplinary Reviews:  
851 Data Mining and Knowledge Discovery 8.4 (2018): e1249.
- 852 Saini, Rashmi, and Sanjay Kumar Ghosh. "Ensemble classifiers in remote sensing: A review."  
853 2017 International Conference on Computing, Communication and Automation (ICCCA).  
854 IEEE, 2017.

- 855 Scholl, V. M., Cattau, M. E., Joseph, M. B., & Balch, J. K. (2020). Integrating national ecological  
856 observatory network (neon) airborne remote sensing and in-situ data for optimal tree  
857 species classification. *Remote Sensing*, 12(9), 1414.
- 858 Sims, Daniel A., and John A. Gamon. "Relationships between leaf pigment content and spectral  
859 reflectance across a wide range of species, leaf structures and developmental stages."  
860 *Remote sensing of environment* 81.2-3 (2002): 337-354.
- 861 Stacy A. Bogan, Alexander S. Antonarakis, Paul R. Moorcroft, Imaging spectrometry-derived  
862 estimates of regional ecosystem composition for the Sierra Nevada, California, *Remote*  
863 *Sensing of Environment*, Volume 228, 2019, Pages 14-30.
- 864 Strahler, A. H., Thomas L. Logan, and Nevin A. Bryant. "Improving forest cover classification  
865 accuracy from Landsat by incorporating topographic information." (1978).
- 866 Strigul, Nikolay, et al. "Scaling from trees to forests: tractable macroscopic equations for forest  
867 dynamics." *Ecological Monographs* 78.4 (2008): 523-545.
- 868 Takahashi Miyoshi, Gabriela, et al. "Evaluation of hyperspectral multitemporal information to  
869 improve tree species identification in the highly diverse atlantic forest." *Remote Sensing*  
870 12.2 (2020): 244.
- 871 Tang, J., S. Alelyani, and H. Liu. "Data Classification: Algorithms and Applications." *Data Mining*  
872 *and Knowledge Discovery Series*, CRC Press (2015): pp. 498-500.
- 873 Tavares, P. A., Beltrão, N. E. S., Guimarães, U. S., & Teodoro, A. C. (2019). Integration of  
874 sentinel-1 and sentinel-2 for classification and LULC mapping in the urban area of  
875 Belém, eastern Brazilian Amazon. *Sensors*, 19(5), 1140.
- 876 The similarity of the spectra within a genus has been described in detail for oaks by:  
877 Tomek, Ivan. "Two modifications of CNN." (1976).
- 878 Tomppo, E., et al. "Combining national forest inventory field plots and remote sensing data for  
879 forest databases." *Remote Sensing of Environment* 112.5 (2008): 1982-1999.

- 880 USDA Forest Service, 2001. Forest Inventory and Analysis National Core Field Guide, Volume  
881 I: Field Data Collection Procedures For Phase 2 Plots, Version 1.5. US Department of  
882 Agriculture, Forest Service, Washington, DC.
- 883 Vangi, Elia, et al. "The new hyperspectral satellite PRISMA: Imagery for forest types  
884 discrimination." *Sensors* 21.4 (2021): 1182.
- 885 Variability in leaf optical properties of Mesoamerican Trees and the potential for species  
886 classification. *American Journal of Botany* 93(4): 517-530.
- 887 Weinstein, B. G., Marconi, S., Bohlman, S. A., Zare, A., Singh, A., Graves, S. J., & White, E. P.  
888 (2021). A remote sensing derived data set of 100 million individual tree crowns for the  
889 National Ecological Observatory Network. *Elife*, 10, e62922.
- 890 White, J. C., et al. "Remote sensing technologies for enhancing forest inventories: A review."  
891 *Canadian Journal of Remote Sensing* 42.5 (2016): 619-641.
- 892 Wiens, J.J., 2016. Climate-related local extinctions are already widespread among plant and  
893 animal species. *PLoS biology*, 14(12).
- 894 Woudenberg, S. W., et al. "The Forest Inventory and Analysis Database: Database description  
895 and users manual version 4.0 for Phase 2." Gen. Tech. Rep. RMRS-GTR-245. Fort  
896 Collins, CO: US Department of Agriculture, Forest Service, Rocky Mountain Research  
897 Station. 336 p. 245 (2010).
- 898 Wright, Ian J., et al. "Cross-species patterns in the coordination between leaf and stem traits,  
899 and their implications for plant hydraulics." *Physiologia Plantarum* 127.3 (2006): 445-  
900 456.
- 901 Wright, Marvin N., and Inke R. König. "Splitting on categorical predictors in random forests."  
902 *PeerJ* 7 (2019): e6339.

903 Xi, Zhouxin, et al. "See the forest and the trees: Effective machine and deep learning algorithms  
904 for wood filtering and tree species classification from terrestrial laser scanning." ISPRS  
905 Journal of Photogrammetry and Remote Sensing 168 (2020): 1-16.

906 Yang, Ce, Won Suk Lee, and Paul Gader. "Hyperspectral band selection for detecting different  
907 blueberry fruit maturity stages." Computers and Electronics in Agriculture 109 (2014):  
908 23-31.

909 Yifang Shi, Andrew K. Skidmore, Tiejun Wang, Stefanie Holzwarth, Uta Heiden, Nicole Pinnel,  
910 Xi Zhu, Marco Heurich, Tree species classification using plant functional traits from  
911 LiDAR and hyperspectral data, International Journal of Applied Earth Observation and  
912 Geoinformation, Volume 73, 2018, Pages 207-219

913 Zare Alina, Susan Meerdink, Yutai Zhou, Caleb Robey, Ron Fick, John Henning, & Paul Gader.  
914 (2019, April 12). GatorSense/hsi\_toolkit\_py: Initial Release (Version v1.0). Zenodo.  
915 <http://doi.org/10.5281/zenodo.2638117>

916 Zhang, Chen, et al. "Tree species classification using deep learning and RGB optical images  
917 obtained by an unmanned aerial vehicle." Journal of Forestry Research 32.5 (2021):  
918 1879-1888.

919 Zou, Hui, and Trevor Hastie. "Regularization and variable selection via the elastic net." Journal  
920 of the royal statistical society: series B (statistical methodology) 67.2 (2005): 301-320.  
921  
922  
923  
924

925

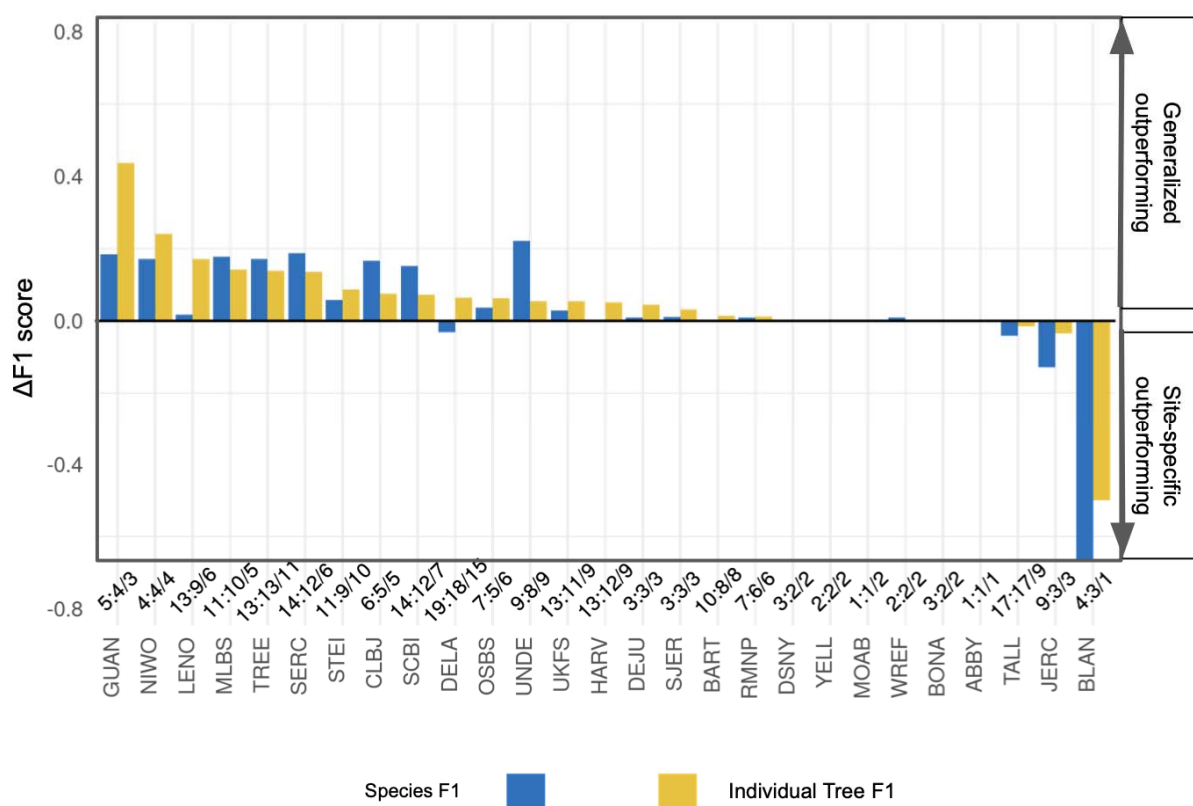

926

927 Figure 1. Performance of generalized vs site-specific classification models for each NEON site.

928 Positive values are sites for which the generalized model performed better than site-level.

929 Negative values are sites for which the generalized model performed worse compared to site-

930 level. Blue bars represent species-level F1 score, yellow bars individual-level F1. Numbers

931 separated by (:) on top of each site name represent the total number of species in the training

932 for each site (general model: site-only model).

933

934

935

936

937

938



939  
940  
941  
942

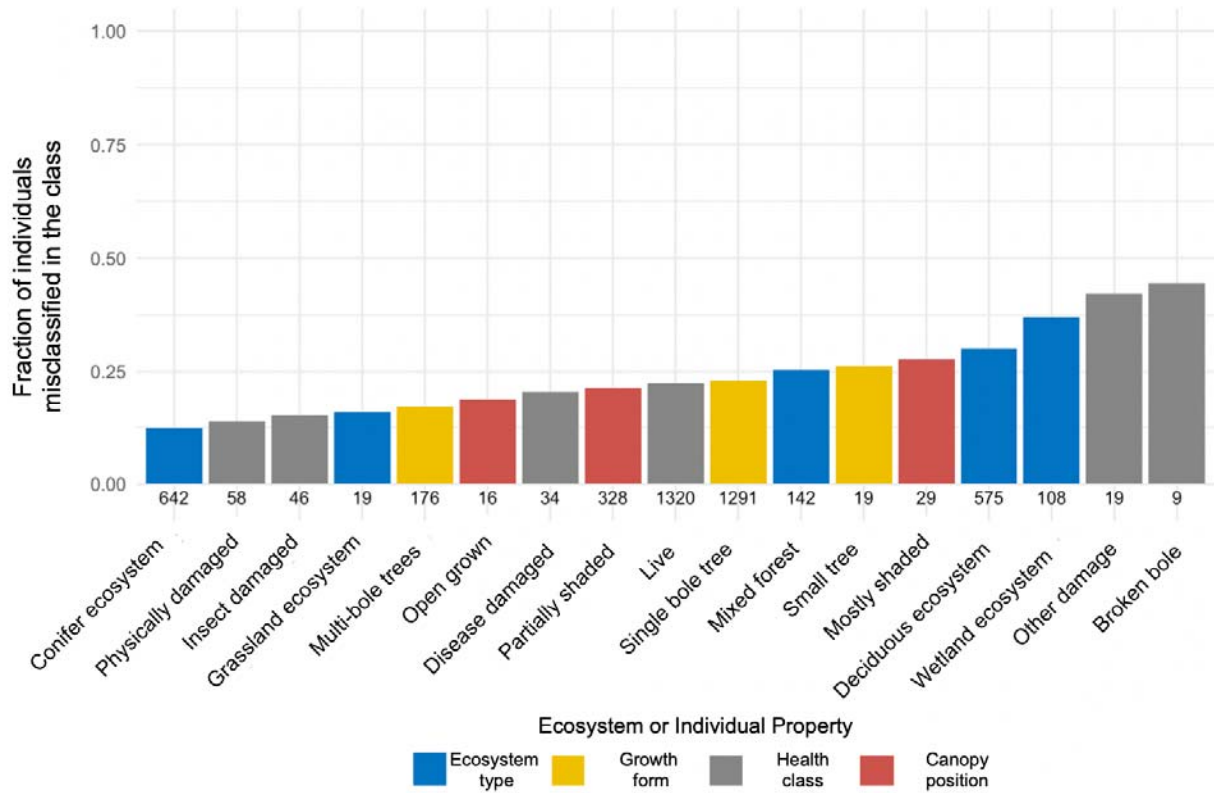

943  
944 Figure 2. Fraction of misclassified trees across ecosystem types (blue), growth form (yellow),  
945 canopy position (red) and health status (gray). Numbers above the x-axis labels are the number  
946 of trees in each category.

947  
948  
949  
950

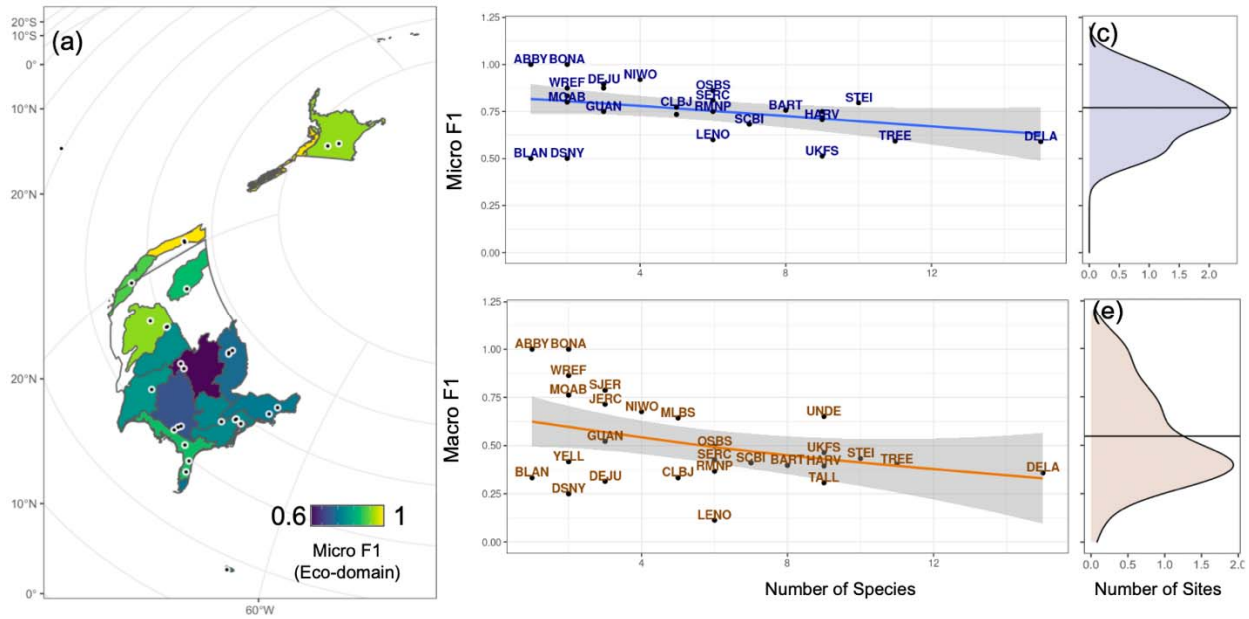

951  
 952 Figure 3. Variation in accuracy of the generalized algorithm across the US. (a) map of average  
 953 individual-level accuracy (Micro F1) for each ecological domain. Dots represent the location of  
 954 each NEON site. Blue polygons represent the Prairie Peninsula and Central-Southern Plains.  
 955 (b) Relationship between individual-level accuracy (Micro F1) and number of species in the  
 956 training dataset for each site (Number of Species). The blue line is the loess smoother  
 957 relationship over the 27 sites. (c) Kernel density estimate of the distribution of individual-level F1  
 958 scores (averages per site). (d) Relationship between species-level accuracy (Macro F1) and  
 959 number of trained species found in site (Number of Species); orange line is the loess smoother  
 960 relationship over the 27 sites. (e) Kernel density estimate of the distribution of species-level  
 961 accuracy scores (averages per site). Horizontal black lines in (d) and (e) represent the average  
 962 accuracy across sites.

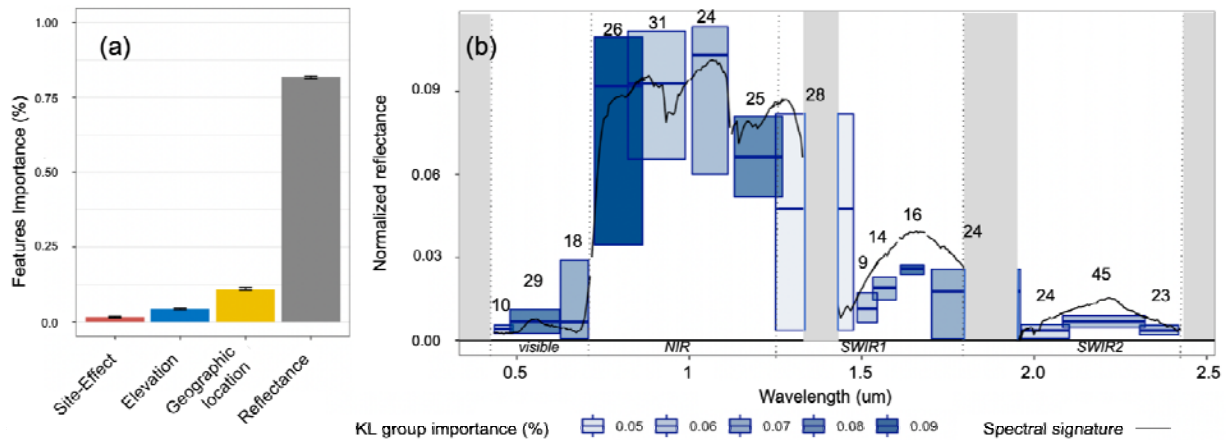

963

964 Figure 4: Features importance calculated from the permutation feature importance procedures

965 described in Breiman, 2001, on the meta-ensemble model. (a) Relative contribution of different

966 feature types: reflectance, as the sum of the 45 features (gray), site coordinates (yellow),

967 elevation (blue) and site effect (red). (b) Relative importance of each Kullback-Leibler group of

968 features used for dimensionality reduction of reflectance. Blue bars represent the reflectance for

969 the average minimum, mean and maximum band in the specific KL group. Numbers on top of

970 each bar represent the number of bands in each group. Bar width represents the range of bands

971 covered by the specific KL group. Some bars overlap due to discontinuity of band assignments

972 to different groups/bars at the group boundaries. Gray bars represent areas with water

973 absorption bands dropped from the original hyperspectral images. Color intensity represents the

974 relative importance of the specific KL group for the classifier (from light blue being of little

975 importance, to dark blue being highly important). Black lines represent the reflectance of a

976 randomly selected pixel to illustrate a typical vegetation reflectance pattern. Reflectance was

977 normalized using L2 normalization. Numbers on top of each blue bar represent the total number

978 of bands in the group.

979

980



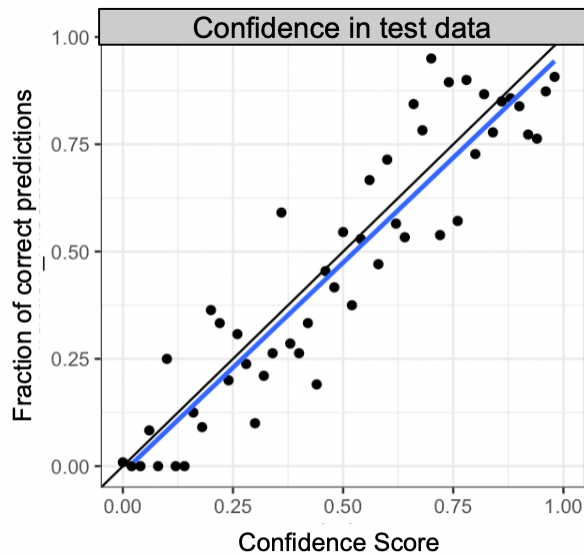

982

983 Figure 5. Evaluation of model confidence score (the probability of assigning the correct label to  
984 a prediction) as a measure of uncertainty. Confidence score was binned into 34 equal-width  
985 bins (each bin representing an interval of 0.03). Bin centers were plotted against the fraction of  
986 trees in that confidence score bin that were correctly classified. The blue line shows the fitted  
987 linear relationship between the confidence score and the proportion of correctly classified trees.  
988 The black line is the 1:1 line.

989

990

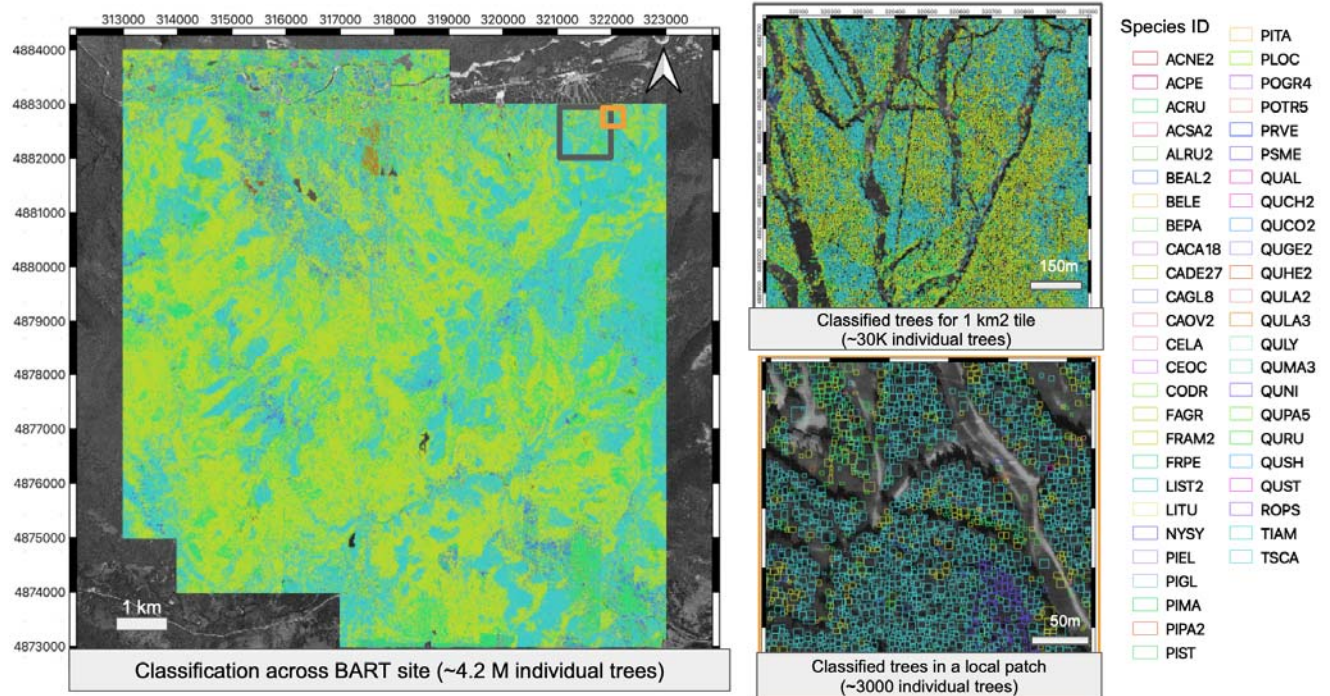

991

992 Figure 6. Example of species classification maps for all individual trees at the Bartlett  
993 Experimental Forest (BART) NEON site in New Hampshire. Species in legend include six of the  
994 most abundant taxa predicted at the site. Individual crown boundaries were estimated using  
995 predictions from Weinstein et al., 2021. The background is gray scale imagery of the site, so the  
996 gray areas on the left panel are regions for which NEON airborne data was not available; the  
997 gray areas on the right hand panels are areas without any trees including roads and other open  
998 areas.

999

1000

1001

1002

1003

1004

1005

1006 Supplement 1: parameterization of classifiers and meta ensemble

1007

1008 KNN classifier was trained using 20 neighboring points, with distance weighted by the  
1009 inverse of their Manhattan distance. The Random Forest classifier was trained using 300 trees  
1010 with up to 7 features (square root of the total predictors) considered for better split, validated  
1011 using cross-entropy loss function on out-of-bag samples. The gradient boosting classifier was  
1012 trained using 1000 maximum iterations, a learning rate of 0.01, max depth of 25 and 0.5 L2  
1013 regularization. Loss was calculated using categorical cross-entropy on out-of-bag samples.  
1014 Multi-layer Perceptron classifier was trained for 1200 max iterations, using relu activation, 1  
1015 hidden layer, weight optimization through adam booster with exponential decay rate of 0.9. The  
1016 Bagging Classifier was trained using 10 support vector machine classifiers as base estimators.  
1017 We used loose regularization ( $C = 1000$ ), RBF kernel, and 5-fold cross validation to calibrate  
1018 probability estimates. The meta ensemble was trained using probability vectors produced by  
1019 each weak classifier. We used a regularized logistic regression (elasticnet), with 0.5 L1 to L2  
1020 penalty ratio. We used a saga solver to optimize the loss function.

1021

1022

1023

1024

1025

1026

1027

1028

1029

1030 Supplement 2: Species level accuracy and scientific names



1031

1032 Species names for all species used for this manuscript along with their precision, recall and  
1033 accuracy can be found in the supplementary file titled “overview\_precision\_recall\_names.csv”.  
1034 Recall is defined as the amount of true positives divided by the sum of true positives plus and  
1035 false negatives; it represents the fraction of relevant instances predicted by the model. F1  
1036 represents the model accuracy for each species.

1037

1038

1039

1040



1041

1042 Supplement 3: Confusion matrix

1043

1044 Confusion matrices were produced using the Caret R package (Kuhn, 2008). For species with  
1045 both precision and recall equaling 0, F1 score was calculated as 0. Tabular version of the  
1046 confusion matrices for predictions on the test (total n = 1487) set for (1) all trees in the test set,  
1047 (2) trees in the test set for each ecodomain, (3) trees in the test set for each site from the  
1048 generalized approach, (4) trees in the test set for each site from site-specific approach, (5) for  
1049 predictions at the genus level can be found in the supplementary file “confusion\_matrices.zip”  
1050 and are organized in separate folders. For each confusion matrix, rows represent observations,  
1051 columns represent predictions. In cases where columns are entirely filled with zeros, we  
1052 removed all species that were not found in either the training or held-out test datasets at each  
1053 individual site. For site level confusion matrices, we only included species for which at least one  
1054 tree was either observed or predicted. Therefore, species with no observations in the test set  
1055 will be assigned to empty columns; species never predicted in the test set will be assigned to  
1056 empty rows. This applies to the overall confusion matrix too, where tested trees were mis-  
1057 predicted as *Gleditsia triacanthos* and *Quercus michauxii* despite these two species not being  
1058 included in the held-out test dataset (empty rows).

1059

1060

1061

1062 **Supplementary Figures**

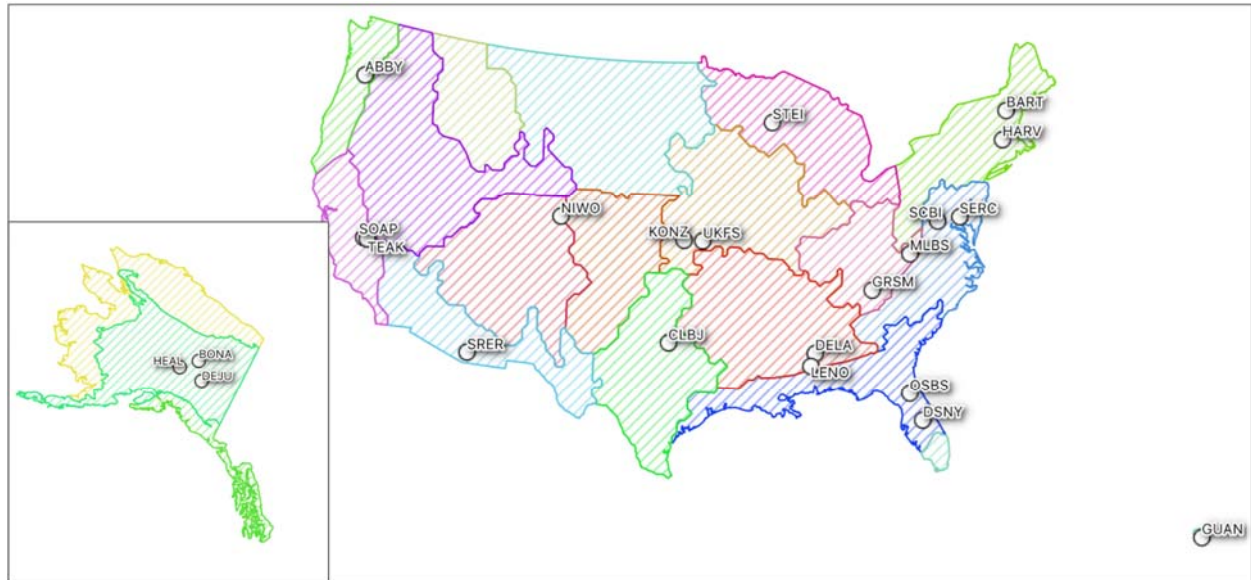

1063

1064 Figure S1 Geographic distribution of NEON sites included for this study. Colored regions  
1065 represent ecological regions defined by NEON ([https://www.neonscience.org/field-sites/about-](https://www.neonscience.org/field-sites/about-field-sites)  
1066 [field-sites](https://www.neonscience.org/field-sites/about-field-sites)). A description of each site and their ecological domain can be found in the  
1067 Supplementary Table 1.

1068

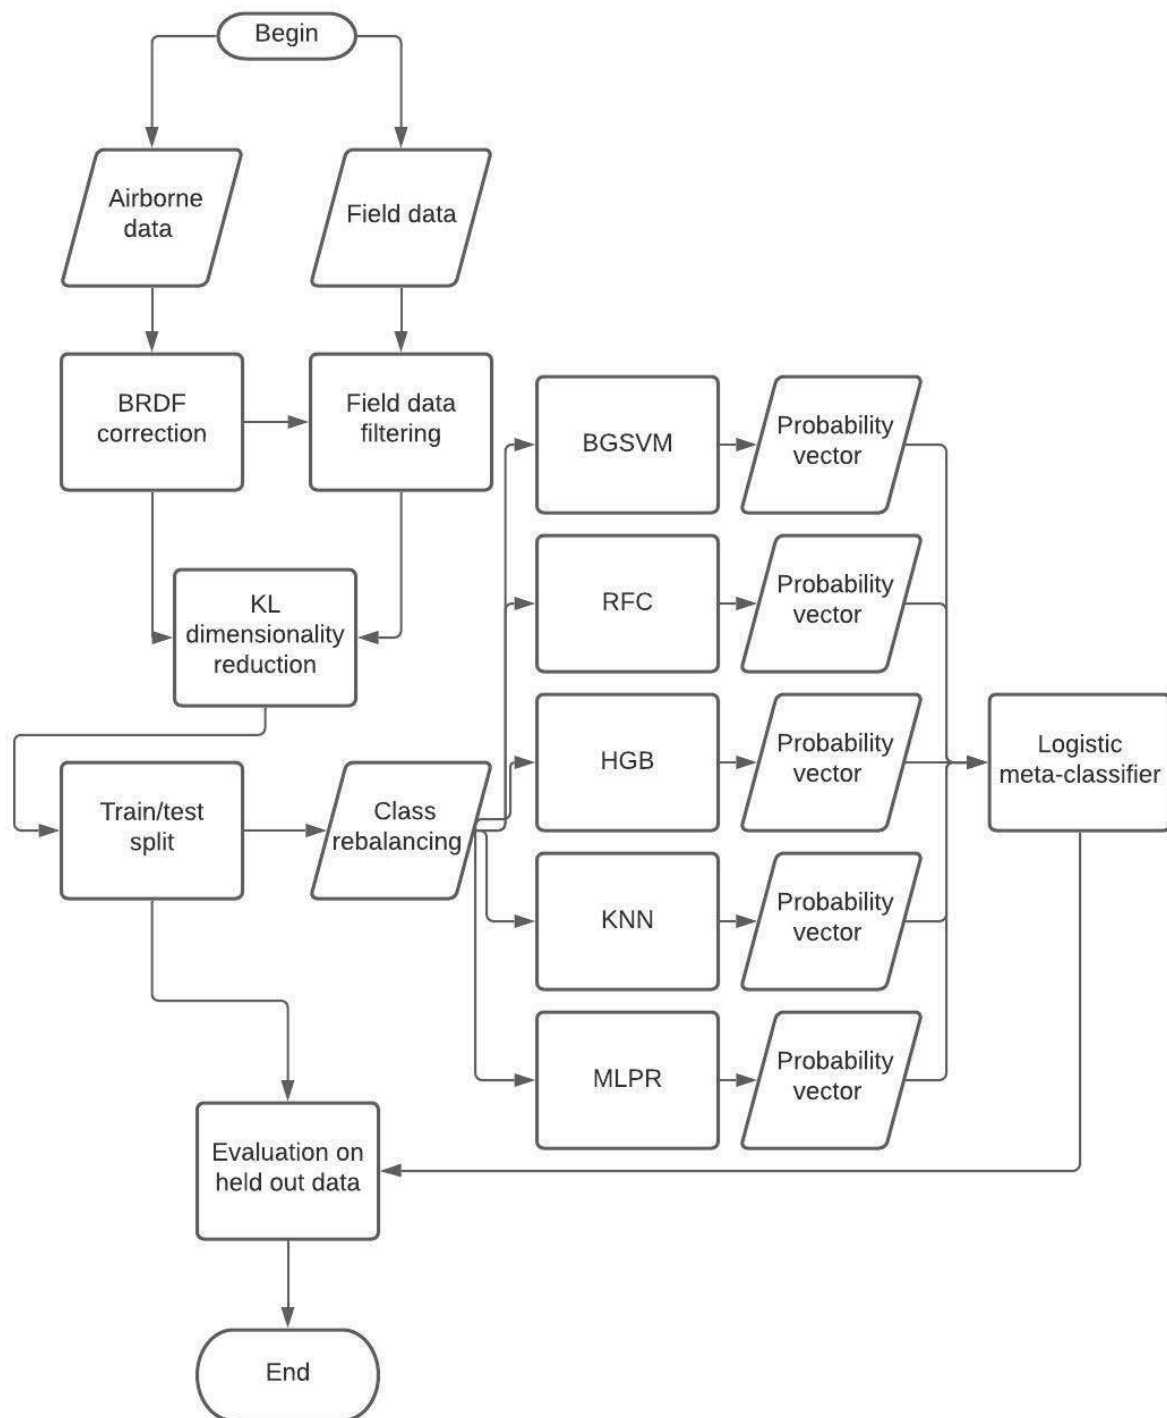

1069

1070

1071 Figure S. 2: Flowchart of the species classification pipeline developed for this study

1072

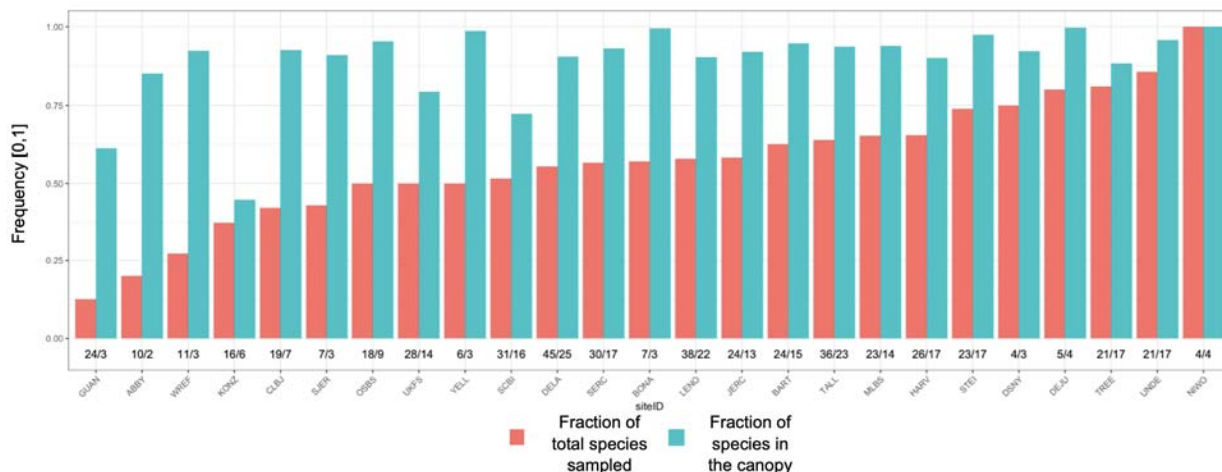

1073

1074 Figure S.3 For each site, the fraction of species included in the test/train dataset compared to  
 1075 the total amount of tree species in the raw NEON vegetation structure dataset (red); the fraction  
 1076 of trees that the species from the test/train dataset comprise out of all canopy trees (blue) in the  
 1077 NEON vegetation structure dataset. The numbers separated by “/” above each site name  
 1078 represent the total number of species in the original dataset and in the filtered data respectively,  
 1079 specific for each site. Trees in the canopy (blue bars) were determined by canopy position data  
 1080 in the vegetation structure data where trees in the canopy were designated as "Full sun",  
 1081 "Mostly shaded", "Partially shaded", "Open growth", or non-classified ("NA").

1082

1083

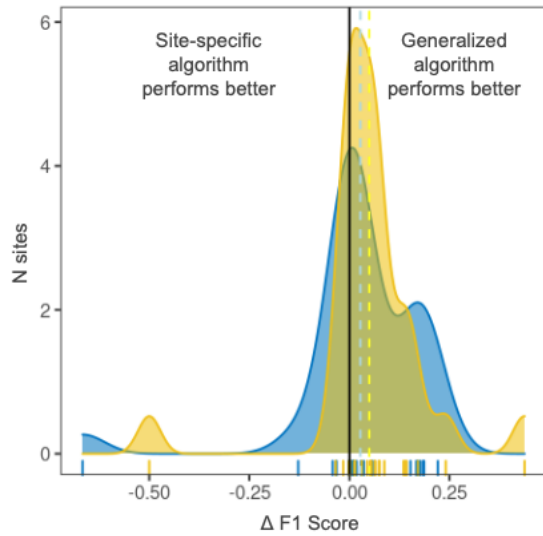

1084

1085 Figure S.4 Density functions of the difference in  $\Delta F1$  scores between the generalized and each  
1086 single-site algorithm for species-level F1 (yellow) and individual-level F1 (blue). Positive  $\Delta F1$   
1087 values (17 out of 27 sites) represent sites where the generalized algorithm outperformed its site-  
1088 specific counterpart. Dashed vertical lines represent the average  $\Delta F1$  across sites (species-  
1089 level F1 = 0.09, individual-level F1 = 0.05).

1090

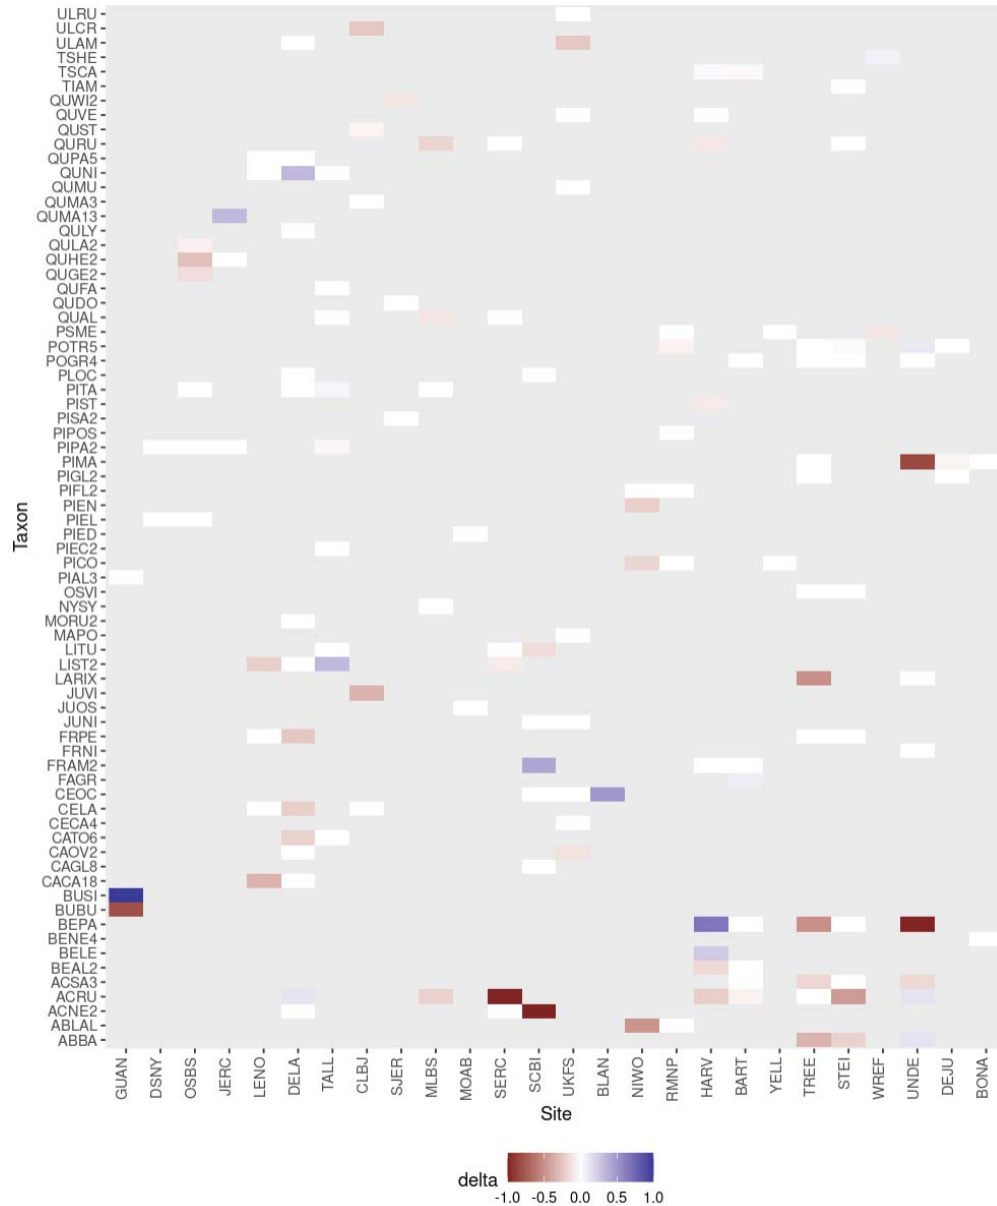

1091  
 1092 Supplement S.5. Difference in accuracy between the general and site-specific approaches for  
 1093 each species-site combination. Negative values (red) represent taxa whose accuracy is higher  
 1094 in the general approach. Blue values represent taxa whose accuracy is higher in the site-  
 1095 specific approach. White values where accuracy was similar for the general and site-specific  
 1096 approaches. Grey are species that do not occur at the site. Sites are sorted by geographic  
 1097 similarity. Species names for each taxon acronym can be found in Supplement 2. Site names  
 1098 can be found in table S1.



1099

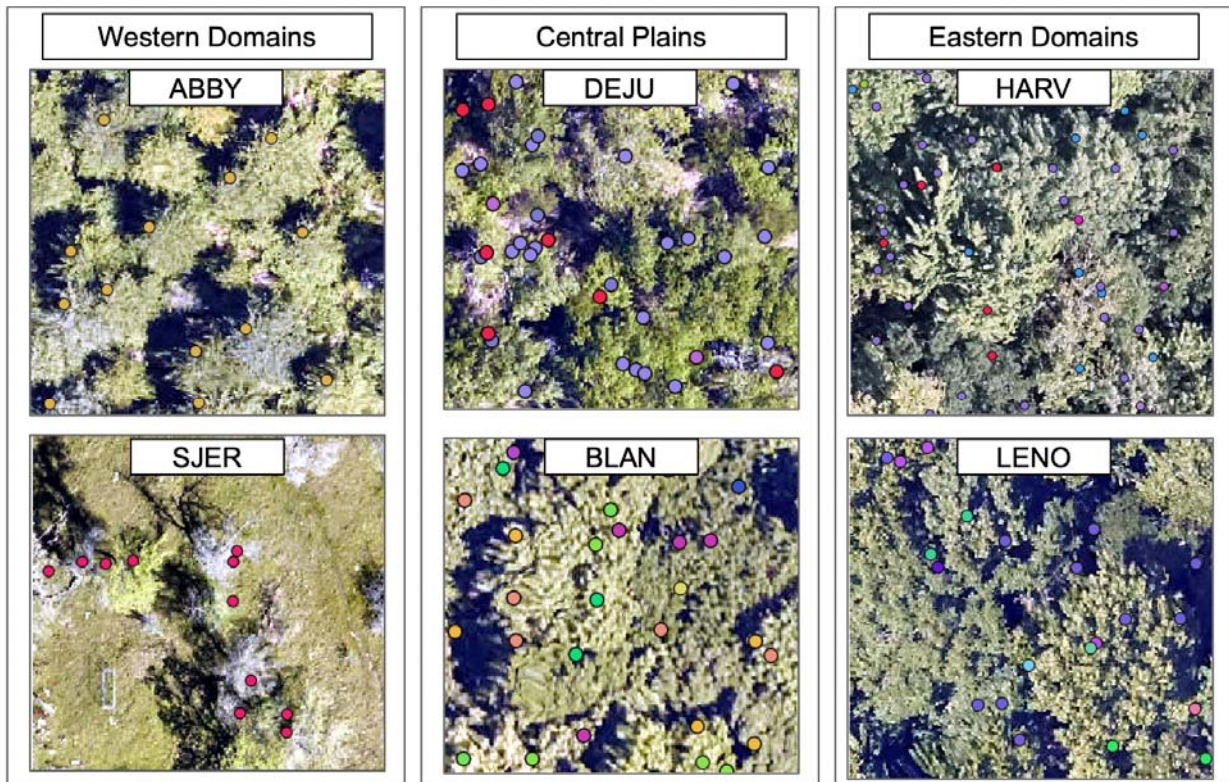

1100

1101

1102 Figure S.6 Example of 400 m<sup>2</sup> plots for 6 sites from western (left panel), central (center panel)  
1103 and eastern US (right panel). Dots represent field stem data collected from NEON vegetation  
1104 structure. Different dot colors represent different species. Only stems that have been filtered to  
1105 include only stems that are likely to be in the canopy. From top left to bottom right sites  
1106 acronyms are Abby Road (ABBY), Delta Junction (DEJU), Harvard Forest (HARV), San Joaquin  
1107 Experimental Range (SJER), Blandy Experimental Farm (BLAN), Lenoir Landing (LENO),

1108

1109

1110

1111

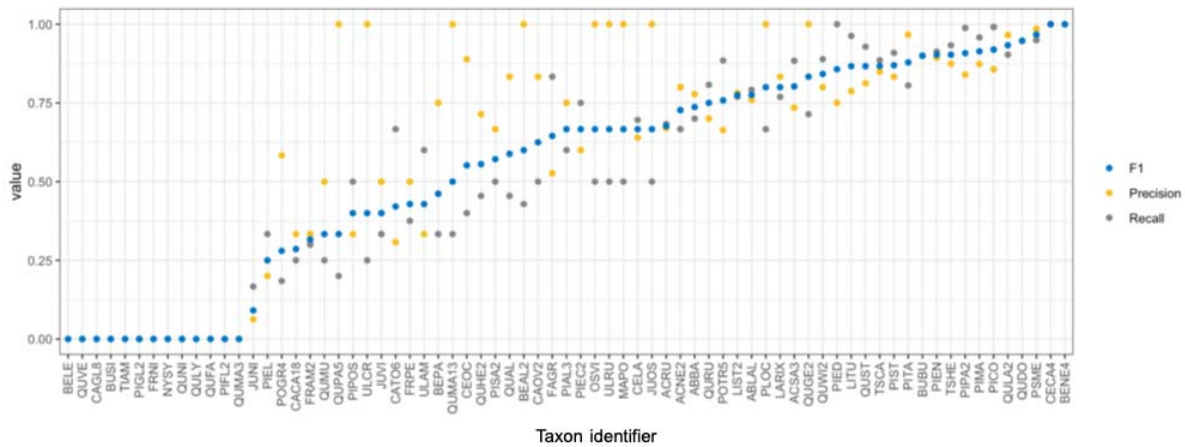

1112

1113 Figure S.7. Precision (blue), Recall (yellow) and F1 (gray) for each individual species included in  
1114 the dataset. Precision is defined by the ratio between the number of true positives and the  
1115 number of true positives plus the number of false positives; it represents the ability of a  
1116 classification model to identify only the relevant data points. Recall is defined as the amount of  
1117 true positives divided by the sum of true positives plus and false negatives; it represents the  
1118 fraction of relevant instances predicted by the model. F1 represents the model accuracy for  
1119 each species. These results, along with the list of species scientific names assigned to each  
1120 code can be found in Supplement S2. Confusion matrices can be found in separate  
1121 supplementary file as described by Supplement 3.

1122

1123



1124

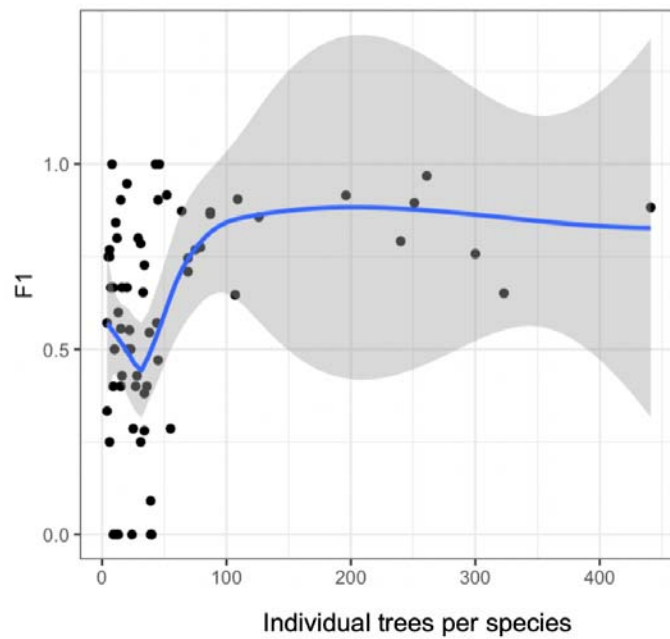

1125

1126 Figure S.8. The relationship between individual species F1 scores and number of individual  
1127 trees available for training for that species. The blue line shows a fitted relationship using local  
1128 polynomial regression fitting (loess) and the grey region shows the 95% confidence interval  
1129 around that relationship.

1130

1131

1132

1133

1134

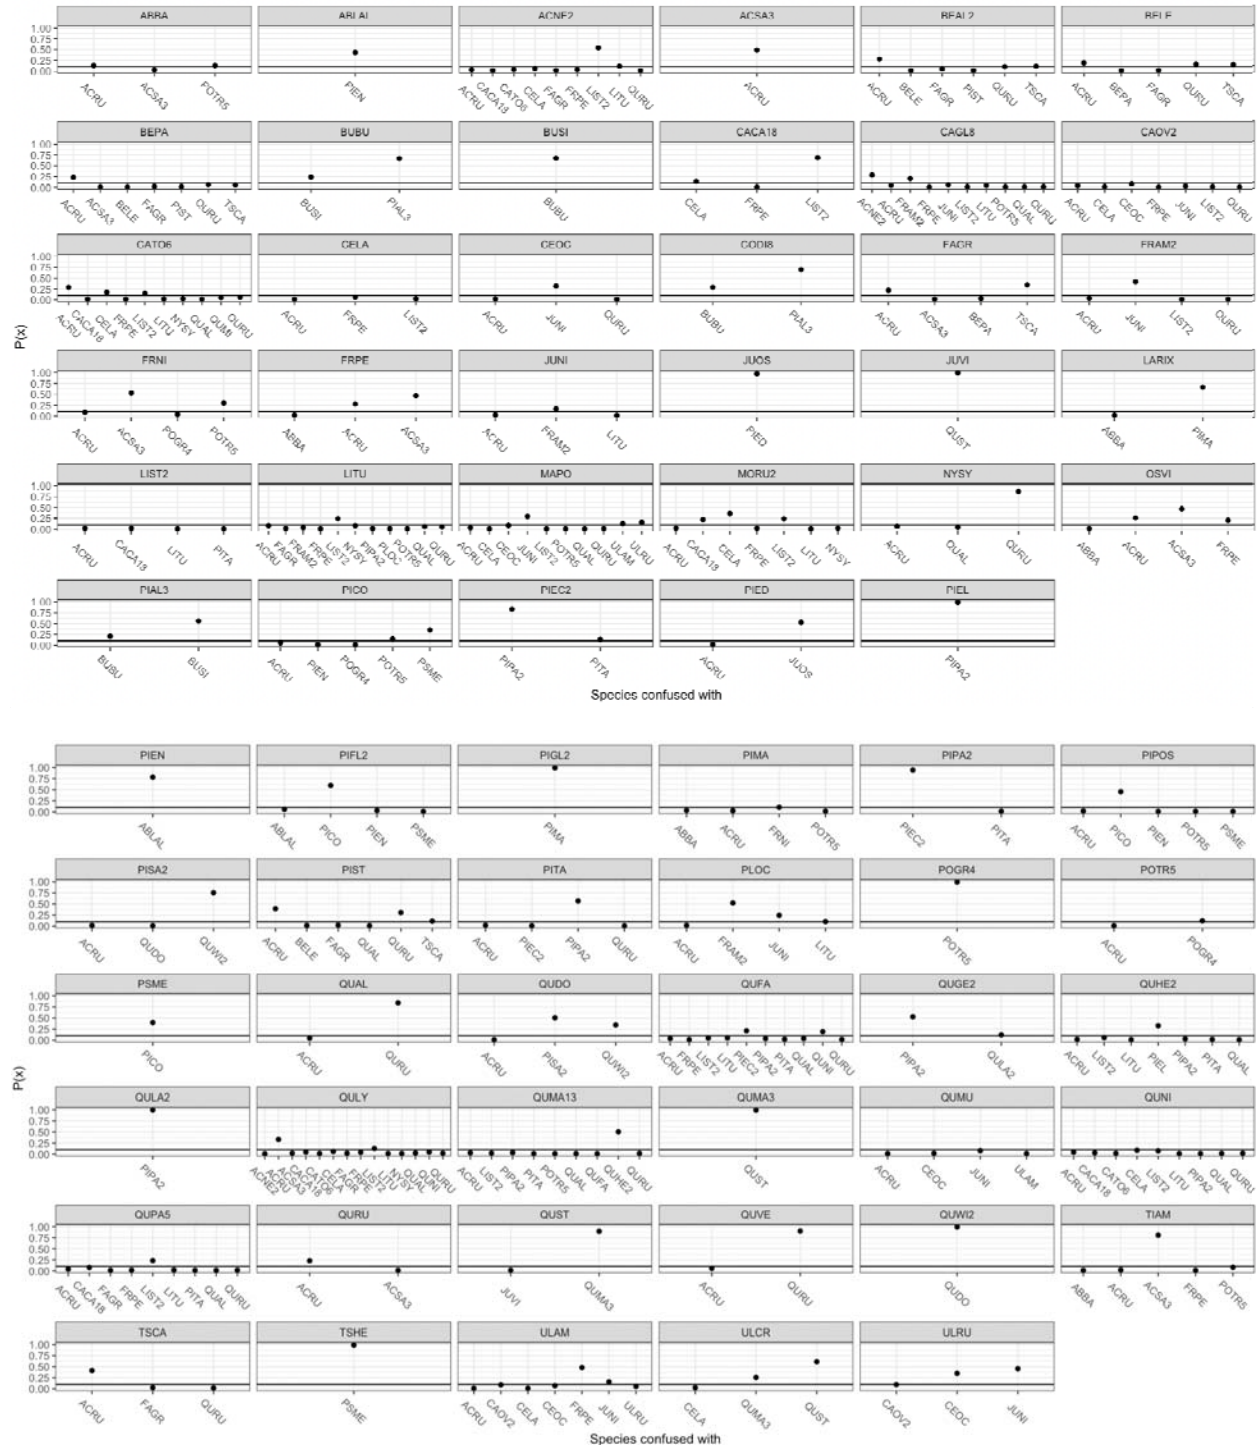

1135

1136

1137 Figure S.9. Confidence score  $P(x)$  for those taxa each species was most confused with. Taxa

1138 with a  $P(x)$  lower than 0.02 were not included. Species names for each taxon acronym can be

1139 found in supplement 2.

1140

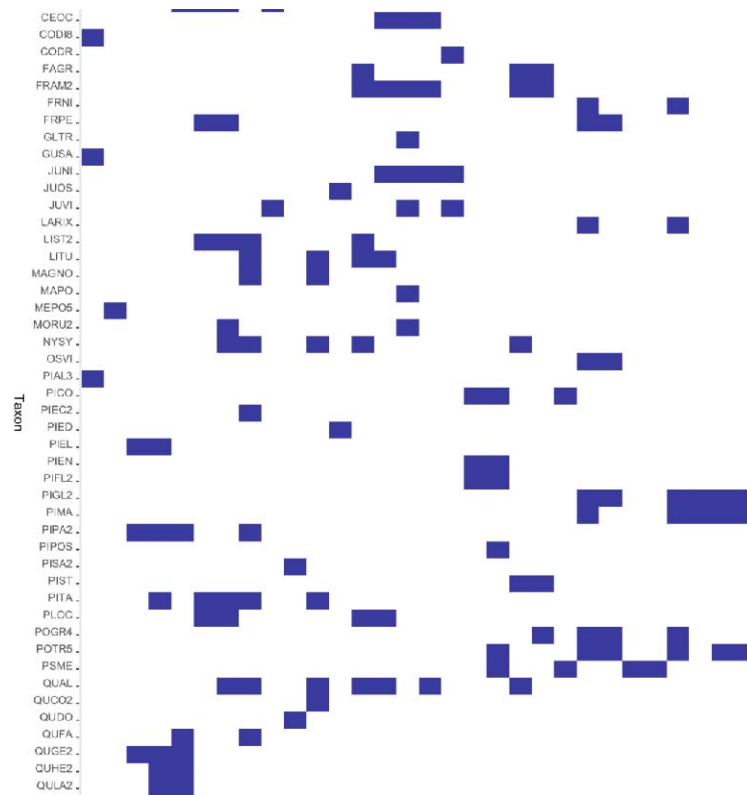

1141

1142 Figure S.10. Distribution of species across sites. Species names for each taxon acronym can be

1143 found in supplement 2. Site names can be found in table S1.



1149

1150

1151

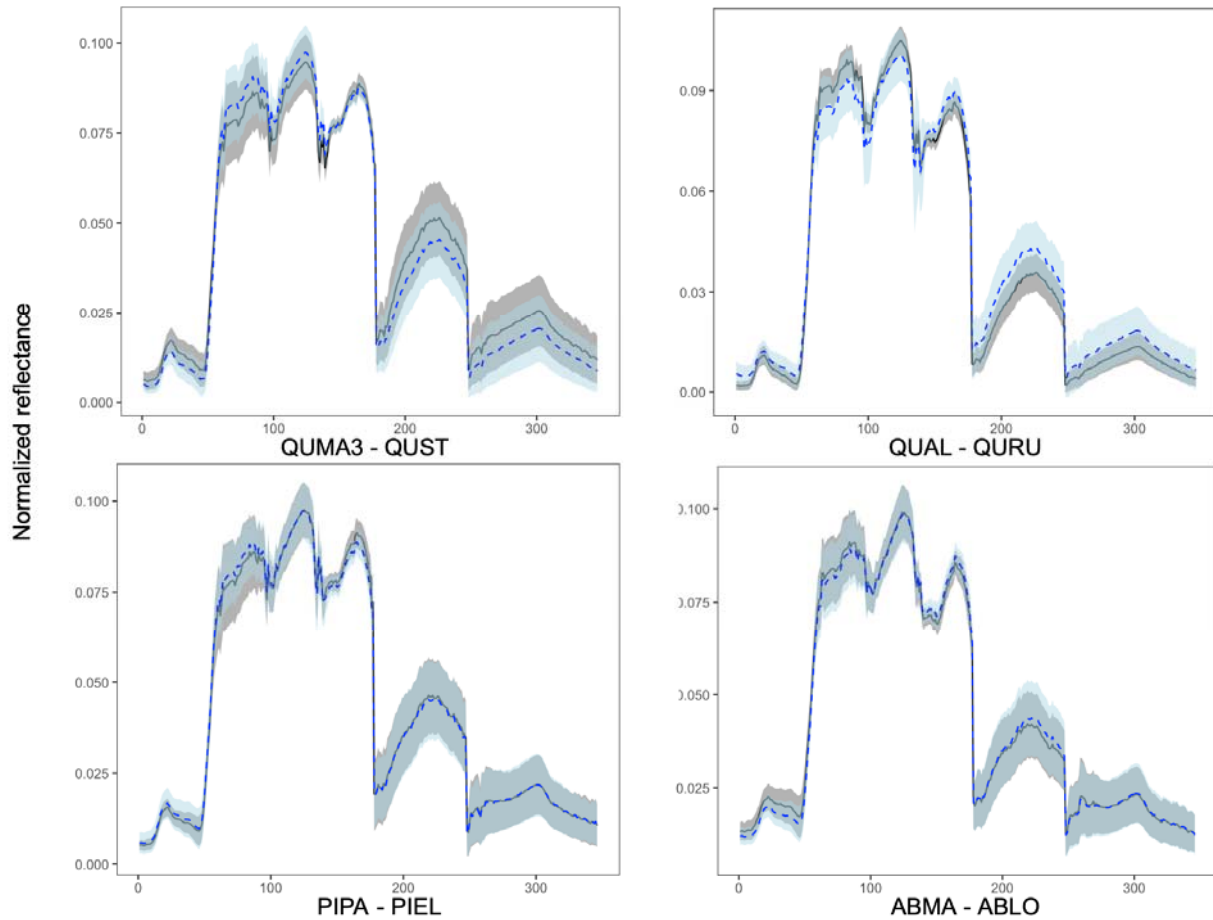

1152

1153 Figure S.12 Example of spectral signature overlap between often confused congeneric species.

1154 Lines represent the average spectra, shaded areas represent the standard deviation for all

1155 pixels extracted for that particular species. The first species in legend is in blue, the second in

1156 grey. The X-axis is the band number from brdf corrected hyperspectral image. Couples of

1157 species are: (a) *Quercus marilandica* and *Quercus stellata*, (b) *Quercus alba* and *Quercus*

1158 *rubra*, (c) *Pinus palustris* and *Pinus elliotii*, (d) *Abies magnifica* and *Abies lowiana*.

1159

1160

| <b>Site Name</b>                                    | <b>Ecological Domain</b> | <b>Domain Name</b>   | <b>State</b>  | <b>Geolocation (Lat-Lon)</b> |
|-----------------------------------------------------|--------------------------|----------------------|---------------|------------------------------|
| Abby Road NEON (ABBY)                               | D16                      | Pacific Northwest    | Washington    | 45.76                        |
|                                                     |                          |                      |               | -122.33                      |
| Bartlett Experimental Forest NEON (BART)            | D01                      | Northeast            | New Hampshire | 44.06                        |
|                                                     |                          |                      |               | -71.29                       |
| Blandy Experimental Farm NEON (BLAN)                | D02                      | Mid Atlantic         | Virginia      | 39.03                        |
|                                                     |                          |                      |               | -78.04                       |
| Caribou-Poker Creeks Research Watershed NEON (BONA) | D19                      | Taiga                | Alaska        | 65.15                        |
|                                                     |                          |                      |               | -147.5                       |
| Dead Lake NEON (DELA)                               | D08                      | Ozarks Complex       | Alabama       | 32.54                        |
|                                                     |                          |                      |               | -87.8                        |
| Delta Junction NEON (DEJU)                          | D19                      | Taiga                | Alaska        | 63.88                        |
|                                                     |                          |                      |               | -145.75                      |
| Disney Wilderness Preserve NEON (DSNY)              | D03                      | Southeast            | Florida       | 28.13                        |
|                                                     |                          |                      |               | -81.44                       |
| Guanica Forest NEON (GUAN)                          | D04                      | Atlantic Neotropical | Puerto Rico   | 17.97                        |
|                                                     |                          |                      |               | -66.87                       |
| Harvard Forest & Quabbin Watershed NEON (HARV)      | D01                      | Northeast            | Massachusetts | 42.54                        |
|                                                     |                          |                      |               | -72.17                       |

|                                                     |     |                                              |          |         |
|-----------------------------------------------------|-----|----------------------------------------------|----------|---------|
| KU Field Station NEON (UKFS)                        | D06 | Prairie<br>Peninsula                         | Kansas   | 39.04   |
|                                                     |     |                                              |          | -95.19  |
| Konza Prairie Biological Station NEON<br>(KONZ)     | D06 | Prairie<br>Peninsula                         | Kansas   | 39.1    |
|                                                     |     |                                              |          | -96.56  |
| Lenoir Landing NEON (LENO)                          | D08 | Ozarks<br>Complex                            | Alabama  | 31.85   |
|                                                     |     |                                              |          | -88.16  |
| Lyndon B. Johnson National Grassland<br>NEON (CLBJ) | D11 | Southern<br>Plains                           | Texas    | 33.4    |
|                                                     |     |                                              |          | -97.57  |
| Moab NEON (MOAB)                                    | D13 | Southern<br>Rockies /<br>Colorado<br>Plateau | Utah     | 38.25   |
|                                                     |     |                                              |          | -109.39 |
| Mountain Lake Biological Station<br>NEON (MLBS)     | D07 | Appalachians<br>/ Cumberland<br>Plateau      | Virginia | 37.38   |
|                                                     |     |                                              |          | -80.52  |
| Niwot Ridge NEON (NIWO)                             | D13 | Southern<br>Rockies /<br>Colorado<br>Plateau | Colorado | 40.05   |
|                                                     |     |                                              |          | -105.58 |
| Ordway-Swisher Biological Station                   | D03 | Southeast                                    | Florida  | 29.69   |

|                                                                    |     |                   |            |         |
|--------------------------------------------------------------------|-----|-------------------|------------|---------|
| NEON (OSBS)                                                        |     |                   |            | -81.99  |
| Rocky Mountains NEON (RMNP)                                        | D10 | Central Plains    | Colorado   | 40.28   |
|                                                                    |     |                   |            | -105.55 |
| San Joaquin Experimental Range NEON (SJER)                         | D17 | Pacific Southwest | California | 37.11   |
|                                                                    |     |                   |            | -119.73 |
| Smithsonian Conservation Biology Institute NEON (SCBI)             | D02 | Mid Atlantic      | Virginia   | 38.89   |
|                                                                    |     |                   |            | -78.14  |
| Smithsonian Environmental Research Center NEON (SERC)              | D02 | Mid Atlantic      | Maryland   | 38.89   |
|                                                                    |     |                   |            | -76.56  |
| Steigerwaldt-Chequamegon NEON (STEI)                               | D05 | Great Lakes       | Wisconsin  | 45.51   |
|                                                                    |     |                   |            | -89.59  |
| Talladega National Forest NEON (TALL)                              | D08 | Ozarks Complex    | Alabama    | 32.95   |
|                                                                    |     |                   |            | -87.39  |
| The Jones Center At Ichauway NEON (JERC)                           | D03 | Southeast         | Georgia    | 31.19   |
|                                                                    |     |                   |            | -84.47  |
| Treehaven NEON (TREE)                                              | D05 | Great Lakes       | Wisconsin  | 45.49   |
|                                                                    |     |                   |            | -89.59  |
| University of Notre Dame Environmental Research Center NEON (UNDE) | D05 | Great Lakes       | Michigan   | 46.23   |
|                                                                    |     |                   |            | -89.54  |
| Wind River Experimental Forest NEON (WREF)                         | D16 | Pacific           | Washington | 45.82   |
|                                                                    |     |                   |            | -121.95 |



|                                       |     |                     |         |         |
|---------------------------------------|-----|---------------------|---------|---------|
|                                       |     | Northwest           |         |         |
| Yellowstone National Park NEON (YELL) | D12 | Northern<br>Rockies | Wyoming | 44.95   |
|                                       |     |                     |         | -110.54 |

1161 Table S.1 Description of NEON sites and ecological domains used in this study.

1162

1163

1164

1165 Supplementary References

1166 Kuhn, M. (2008). Building predictive models in R using the caret package. *Journal of statistical*

1167 *software*, 28, 1-26.

1168
